1 **Network instability dynamics drive a transient bursting period in the**  
2 **developing hippocampus *in vivo***

3 Jürgen Graf <sup>1,5</sup>, Vahid Rahmati <sup>1,2,3,5</sup>, Myrtill Majoros <sup>1</sup>, Otto W. Witte <sup>1</sup>, Christian Geis <sup>1,2</sup>,  
4 Stefan J. Kiebel <sup>3</sup>, Knut Holthoff <sup>1,6</sup> and Knut Kirmse <sup>1,4,6\*</sup>

5 <sup>1</sup> Hans-Berger Department of Neurology, Jena University Hospital, 07747 Jena, Germany

6 <sup>2</sup> Section Translational Neuroimmunology, Jena University Hospital, 07747 Jena, Germany

7 <sup>3</sup> Department of Psychology, Technical University Dresden, 01187 Dresden, Germany

8 <sup>4</sup> Department of Neurophysiology, Institute of Physiology, University of Würzburg, 97070  
9 Würzburg, Germany

10 <sup>5</sup> These authors contributed equally.

11 <sup>6</sup> Senior authors

12 Number of Figures – 7

13 Number of Supplemental Figures – 1

14 Number of Supplemental Tables – 5

15 \* Correspondence to:

16 Dr. Knut Kirmse

17 Department of Neurophysiology, Institute of Physiology, University of Würzburg, 97070

18 Würzburg, Germany

19 Phone: +49 (0)931 31 87473

20 Fax: +49 (0)931 31 82741

21 E-mail: [knut.kirmse@uni-wuerzburg.de](mailto:knut.kirmse@uni-wuerzburg.de)

## Abstract

Spontaneous correlated activity is a universal hallmark of immature neural circuits. However, the cellular dynamics and intrinsic mechanisms underlying neuronal synchrony in the intact developing brain are largely unknown. Here, we use two-photon  $\text{Ca}^{2+}$  imaging to comprehensively map the developmental trajectories of spontaneous network activity in hippocampal area CA1 *in vivo*. We unexpectedly find that synchronized activity peaks after the developmental emergence of effective synaptic inhibition in the second postnatal week. We demonstrate that the enhanced network synchrony reflects an increased functional coupling of individual neurons to local population activity. However, pairwise neuronal correlations are low, and network bursts recruit CA1 pyramidal cells in a virtually random manner. Using a dynamic systems modeling approach, we reconcile these experimental findings and identify network bi-stability as a potential regime underlying network burstiness at this age. Our analyses reveal an important role of synaptic input characteristics and network instability dynamics for the emergence of neuronal synchrony. Collectively, our data suggest a mechanism, whereby developing CA1 performs extensive input-discrimination learning prior to the onset of environmental exploration.

**Keywords:** CA1, development, two-photon  $\text{Ca}^{2+}$  imaging, *in vivo*, network modeling, stability

## 40 Introduction

41 Developing neural circuits generate correlated spontaneous activity in which synchronous  
42 activations of large groups of neurons are interspersed by relatively long periods of  
43 quiescence (Molnar et al., 2020). In rodents, synchronized network activity commences long  
44 before the onset of hearing, vision and active environmental exploration and makes important  
45 contributions to the proper assembly of brain circuits (Kirkby et al., 2013). Activity-dependent  
46 refinements operate at multiple steps of maturation, including the control of neural progenitor  
47 progression (Vitali et al., 2018), apoptotic cell death (Blanquie et al., 2017; Wong et al., 2018),  
48 neuronal cell-type specification (Sun et al., 2018), migration (Maset et al., 2021) as well as  
49 synapse formation and plasticity (Oh et al., 2016; Sando et al., 2017; Winnubst et al., 2015).  
50 Experimental and theoretical evidence suggests that, in addition to the overall level of activity,  
51 specific spatiotemporal firing patterns are critical for activity-dependent refinements to occur  
52 (Zhang et al., 2011; Albert et al., 2008).

53 A representative example of correlated spontaneous network activity is found in the neonatal  
54 hippocampus *in vivo*. During the first postnatal week, the main electrophysiological signature  
55 are bursts of multi-unit activity (MUA) (Leinekugel et al., 2002), which bilaterally synchronize  
56 large parts of the dorsal CA1 and are often accompanied by sharp waves (SPWs) in the local  
57 field potential (Valeeva et al., 2020; Valeeva et al., 2019). SPWs frequently follow myotonic  
58 limb or whisker twitches (Karlsson et al., 2006; Valeeva et al., 2019; Del Rio-Bermudez et al.,  
59 2020), suggesting that SPWs convey feedback information from the somatosensory  
60 periphery. By the second postnatal week, discontinuous activity in the olfactory bulb drives  
61 network oscillations in the entorhinal cortex (Gretenkord et al., 2019), further pointing to a role  
62 of multi-sensory integration in limbic ontogenesis. Interestingly, recent *in vivo* investigations  
63 revealed that GABAergic interneurons (INs) could promote MUA bursts in the neonatal CA1

64 through NKCC1-dependent excitation of pyramidal cells (PCs), although inhibitory effects of  
65 GABAergic signaling coexist (Graf et al., 2021; Murata et al., 2020; but see Valeeva et al.,  
66 2016). A qualitatively similar situation applies to the immature hippocampus *in vitro* (Ben-Ari  
67 et al., 1989; Flossmann et al., 2019), in which correlated spiking of PCs is facilitated by  
68 increasing the intracellular chloride concentration (Zhang et al., 2019; Spoljaric et al., 2019),  
69 whereas inhibition of chloride uptake has the opposite effect (Dzhala et al., 2005). In this line,  
70 *in vitro* studies suggest that correlated spontaneous activity largely disappears by the  
71 beginning of the second postnatal week, when the reversal potential of GABA<sub>A</sub> receptor-  
72 mediated currents shifts into the hyperpolarizing direction (Tyzio et al., 2008; Spoljaric et al.,  
73 2017). However, the developmental trajectories of cellular network firing dynamics in the  
74 hippocampus *in vivo* remain unknown.

75 Using two-photon Ca<sup>2+</sup> imaging, we here provide the first detailed analysis of the  
76 spatiotemporal dynamics of network activity in the developing CA1 region at single-cellular  
77 resolution *in vivo*. We reveal that CA1 PCs undergo a transient period of enhanced burst-like  
78 network activity during the second postnatal week, when GABA already acts as an inhibitory  
79 transmitter. Our results show that, at this time, network bursts (NBs) recruit CA1 PCs in an  
80 almost random manner, and recurring cellular activation patterns become more stable only  
81 after eye opening. Using computational network modeling, we identify bi-stability as a  
82 dynamical regime underpinning the enhanced bursting activity of CA1 PCs. We show that  
83 NBs mainly reflect the network's intrinsic instability dynamics, which exquisitely depend on  
84 proper input timing and strength. In addition, inhibitory GABAergic signaling effectively  
85 promotes state transitions underlying NB generation. Our data suggest a mechanism,  
86 whereby CA1 undergoes extensive input-discrimination learning before the onset of  
87 environmental exploration.

## Results

### *Reliable detection of somatic $Ca^{2+}$ transients in densely labeled tissue*

We used *in vivo* two-photon laser-scanning microscopy (2PLSM) in spontaneously breathing, head-fixed *Emx1<sup>IREScree</sup>:GCaMP6s<sup>LSL</sup>* mice to record somatic  $Ca^{2+}$  transients (CaTs) from CA1 PCs as a proxy of their firing activities. In this strain, Cre is expressed in virtually all CA1 PCs (Kummer et al., 2012; Gorski et al., 2002). Due to the finite point-spread function inherent to 2PLSM, dense cell labeling resulted in a non-negligible overlap of signals originating from neighboring somata and/or neurites (Denis et al., 2020; Chen et al., 2020). Our preliminary analysis revealed that, under such conditions, standard CaT detection methods based on analyzing mean fluorescence intensities from regions of interests (ROIs) can lead to substantial false positive rates (Fig. 1). We therefore devised a novel cell-specific spatial template-matching approach for the reliable detection of CaTs in densely labeled tissue, which we refer to as CATHARSiS (Calcium transient detection harnessing spatial similarity). CATHARSiS makes use of the fact that, for each cell, the spike-induced changes in GCaMP fluorescence intensity ( $\Delta F$ ) have a specific, spatially inhomogeneous (ring-like) configuration (see Methods for details). In brief, a cell-specific spatial  $\Delta F$  template representing the active cell is computed (Figs. 1A and 1B) and optimally scaled to fit its  $\Delta F$  in each recorded frame. Based on the optimum scaling factor and the quality of the fit, a detection criterion  $D(t)$  is computed for each time point (Clements et al., 1997).  $D(t)$  is then subjected to a general-purpose event detection routine for the extraction of CaT onsets (Rahmati et al., 2018). We first illustrate CATHARSiS by analyzing simulated spike-induced CaTs in ring-shaped cells (Figs. 1A and 1B). Here, fluorescence signals of the cell of interest were contaminated by (I) signals originating from a partially overlapping second cell, (II) spatially homogenous fluorescence changes mimicking axon-based neuropil activity (Kerr et al., 2005) and (III) a low

112 level of Poissonian noise (Fig. 1C). Figures 1C and 1D demonstrate that  $D(t)$  will increase  
113 only if  $\Delta F$  has a spatial configuration similar to that of the template, i.e. if the simulated cell is  
114 active. Of note,  $D(t)$  is insensitive to a spatially uniform offset of  $\Delta F$  and can decrease for  
115 mean  $\Delta F$  increases having a dissimilar spatial configuration (#3 in Figs. 1C and 1D). We  
116 applied CATHARSiS to two simulated sample cells of identical shape and varied their spatial  
117 overlap from 0 to 75% of the cell area, in accordance to the observed overlap in our empirical  
118 data. CATHARSiS correctly retrieved all ground-truth CaTs without false positive events ( $n =$   
119 665 CaTs in total). We also found that the delay of detected CaT onsets vs. simulated spikes  
120 was low ( $-0.3 \pm 0.0$  frames), pointing to a high temporal accuracy of spike reconstruction,  
121 which is a prerequisite of a precise analysis of network activity patterns and cellular  
122 synchronicity. We next evaluated CATHARSiS on data recorded from developing CA1 PCs in  
123 *Emx1<sup>IREScree</sup>:GCaMP6s<sup>LSL</sup>* mice *in vivo* (Figs. 1E and 1F). For comparison, a consensus visual  
124 annotation by human experts was used (Fig. 1G, top), as simultaneous electrophysiological  
125 data were not available (see Methods). We compared CATHARSiS to an event detection  
126 routine based on analyzing mean  $\Delta F(t)$  and found that recall was  $\sim 95\%$  for both approaches  
127 (Fig. 1I; see Table S1). However, CATHARSiS yielded considerably fewer false positive  
128 events, thus resulting in a significantly higher precision and F1 score (Fig. 1I). Importantly, the  
129 delay of detected CaT onsets relative to the consensus annotation was consistently low ( $0.9 \pm$   
130  $0.1$  frames at a frame rate of 11.6 Hz,  $n = 20$  cells), confirming that CATHARSiS achieved a  
131 high temporal accuracy.

132 We conclude that CATHARSiS is suited for the reliable reconstruction of somatic CaTs in  
133 densely packed neuronal tissue with both high detection and temporal accuracies.

134

135 *A transient period of firing equalization during CA1 development in vivo*

136 In the adult CA1, firing rate distributions are approximately log-normal, implying that a minority  
137 of neurons accounts for the majority of spikes. In addition, firing rates of individual cells are  
138 relatively stable across brain states and tasks, suggesting that skewed firing rate distributions  
139 reflect an inherent characteristic of mature hippocampal computations (Mizuseki et al., 2013).  
140 To reveal the developmental trajectory of single-cell firing characteristics, we applied  
141 CATHARSiS to extract spontaneous CaTs from *Emx1+* PCs at P3–4 (n = 19 fields of view  
142 [FOVs]), P10–12 (n = 11 FOVs) and P17–19 (n = 12 FOVs), respectively (Fig. 2A). For the  
143 sake of brevity, these age groups are hereafter referred to as P4, P11 and P18, respectively.  
144 We found that mean CaT frequencies significantly increased ~2.5-fold from  $1.5 \pm 0.2 \text{ min}^{-1}$  at  
145 P4 to  $3.9 \pm 0.4 \text{ min}^{-1}$  at P11 and remained relatively stable afterwards (P18:  $4.8 \pm 0.3 \text{ min}^{-1}$ ,  
146 Figs. 2B and 2C; see Table S2). Additionally, we observed a striking change in the shape of  
147 CaT frequency distributions, which were broad and strongly right-tailed at P4 and P18, but  
148 much less so in the second postnatal week (Fig. 2B). To quantify the dispersion of firing rates  
149 among individual cells, we plotted the corresponding Lorenz curves (Fig. 2D), in which the  
150 cumulative proportion of CaT frequencies is plotted against the cumulative proportion of cells  
151 rank-ordered by frequency (Mizuseki et al., 2013). Here, the line of equality represents the  
152 case where all neurons have equal firing rates. We computed the Gini coefficient as a  
153 measure of deviation from equality (for a graphical representation, see inset in Fig. 2D). Gini  
154 coefficients underwent a transient minimum at P11, indicating that CaT frequencies among  
155 individual neurons were considerably more similar to each other as compared to P4 and P18  
156 (Fig. 2E). We next addressed whether these developmental alterations in firing rates were  
157 accompanied by changes in the irregularity of firing in individual cells. The local coefficient of  
158 variation (CV2), a robust measure of local spiking irregularity (Holt et al., 1996; Ponce-Alvarez  
159 et al., 2010), gradually declined from P4 to P18 (Fig. 2G). At P11, CV2 was close to one,

160 indicating that the irregularity of CaT occurrence is similar to that of a Poissonian point  
161 process, in which successive events occur independently of one another. As previously  
162 observed for CaT frequencies, CV2 distributions were also relatively broad at P4 and P18, but  
163 narrow at P11 (Fig. 2F). Consistently, Gini coefficients of CV2 showed a distinct minimum at  
164 P11 (see #4 in Table S2).

165 Collectively, our data reveal a transient equalization of the firing statistics of individual CA1  
166 PCs during the second postnatal week, while highly skewed firing-rate distributions eventually  
167 emerge only around/after eye opening.

168

169 *CA1 undergoes a transient enhanced bursting period in vivo*

170 Previous *in vitro* work has identified giant depolarizing potentials (GDPs) as the most  
171 prominent pattern of synchronized network activity in the neonatal hippocampus (Ben-Ari et  
172 al., 1989; Leinekugel et al., 1997; Garaschuk et al., 1998). GDPs depend on a depolarizing  
173 action of GABA<sub>A</sub> receptor-dependent transmission (Ben-Ari et al., 1989; Owens et al., 1996)  
174 and disappear at around the beginning of the second postnatal week, when GABA actions  
175 shift from mainly excitatory to mainly inhibitory (Yamada et al., 2004; Tyzio et al., 2007). To  
176 investigate whether a similar developmental profile of NB generation exists in the CA1 *in vivo*,  
177 we next determined the time-course of the fraction of active cells  $\Phi(t)$  (Fig. 3A). We found  
178 that, at P4, CA1 PCs spent relatively long time periods in a low-activity (silent) state, which  
179 was interspersed by transient periods of co-activation, i.e. NBs (Fig. 3A, left). During NBs,  $\Phi(t)$   
180 rarely exceeded 20% indicating that the degree of synchronous activation *in vivo* is  
181 considerably lower than that reported for GDPs *in vitro* (Leinekugel et al., 1997; Garaschuk et  
182 al., 1998; Flossmann et al., 2019). In contrast to GDPs *in vitro*, bursting activity was even  
183 more pronounced at P11, when the network tended to oscillate between an almost silent and



184 a bursting state with an inter-burst period of ~2–10 seconds (Fig. 3A, middle). CA1 PCs  
185 frequently maintained such oscillatory behavior for several minutes. At P18, network activity  
186 was more continuous than at earlier stages, and large NBs were generally rare (Fig. 3A,  
187 right).

188 To quantify developmental changes in the rhythmicity of network activity, we first computed  
189 the power spectrum of  $\Phi(t)$ . At P11, this revealed a distinct peak in the range of ~0.1–0.5 Hz  
190 (Fig. 3B), pointing to the existence of a preferred oscillation frequency of CA1 PCs. Such a  
191 power peak was absent at P4 and reduced at P18. Accordingly, band-power in the 0.1–0.5 Hz  
192 frequency range was significantly higher in the second postnatal week than at earlier or later  
193 stages (Fig. 3C, see Table S3).

194 To characterize periods of synchronized network activity in more detail, we next defined NBs  
195 by thresholding  $\Phi(t)$  (Fig. 3A and Methods). The fraction of time that the network spent in NBs  
196 was lowest at P4 and peaked at P11 (Fig. 3D). Moreover, NBs at P18 were significantly  
197 shorter in duration than during the first and second postnatal weeks (Fig. 3E). We quantified  
198 NB size as the fraction of active cells (corrected for the threshold applied to  $\Phi(t)$ ) and found  
199 that it only declined after P11 (Fig. 3F). At P11, each neuron participated in  $14.4 \pm 1.2\%$  of all  
200 NBs, which significantly exceeded participation rates at P4 ( $10.3 \pm 0.8\%$ ) and P18 ( $11.2 \pm$   
201  $0.4\%$ ) (see #5 in Table S3). Additionally, distributions of participation rates were very narrow  
202 at P11 (Fig. 3G), pointing to a greater similarity of cells with respect to their contribution to NB  
203 generation as compared to earlier or later developmental stages. We confirmed this  
204 equalization of the single-neuron contribution to NBs by analyzing the Gini coefficient of  
205 participation rates, which we found to be lowest at P11 (#6 in Table S3).

206 Taken together, our data reveal that CA1 undergoes a transient period of enhanced bursting  
207 activity during the second postnatal week *in vivo*. These network discharges display

208 rhythmicity in the sub-Hz range – in spite of the close-to-random firing of individual PCs.

209

210 *Enhanced population coupling underlies network burstiness in the second postnatal week in*

211 *vivo*

212 The transient developmental increase in bursting propensity was unexpected, as (1) GDPs *in*

213 *vitro* disappear soon after the first postnatal week (Ben-Ari et al., 1989; Garaschuk et al.,

214 1998; Khazipov et al., 2004) and (2) previous *in vivo* data from the visual and somatosensory

215 neocortex revealed a desynchronization in firing of local neuronal populations during the

216 same time period (Rocheffort et al., 2009; Golshani et al., 2009; van der Bourg et al., 2017;

217 Colonnese et al., 2010). We therefore assessed whether the enhanced burstiness at P11

218 reflects an increase in functional neuronal coupling. To this end, we first investigated the

219 coupling of single cell firing to that of the overall population. For each cell, we computed its

220 population coupling (PopC) index (Okun et al., 2015; Sweeney et al., 2020) and tested for its

221 significance using surrogate data (see Methods). The PopC index significantly peaked at P11

222 (Fig. 4A, Table S4), while there was no difference between P4 and P18. The higher PopC

223 index at P11 arose from a significantly higher fraction of coupled cells (Fig. 4B), whereas the

224 indices of coupled cells were similar (Fig. 4C). We next addressed whether the increased

225 PopC index at P11 results from an increase in pairwise temporal correlation of neuronal firing

226 activities. To this end, we computed the spike time tiling coefficient (STTC) as a frequency-

227 independent affinity metric of two firing-event time series (Cutts et al., 2014) (Fig. 4D). The

228 fraction of significantly correlated cell pairs did not significantly differ between P4 and P11

229 (P4:  $13 \pm 2\%$ , P11:  $23 \pm 5\%$ ), but strongly decreased to  $5 \pm 1\%$  at P18 (Fig. 4E). Remarkably,

230 STTCs of significantly correlated pairs profoundly declined from  $0.18 \pm 0.01$  at P4 to  $0.09 \pm$

231  $0.01$  already at P11, but did not significantly change afterwards (P18:  $0.10 \pm 0.00$ ; Figs. 4F

232 and 4G). These data suggest that developmental changes in pairwise neuronal correlations  
233 do not account for the increased PopC nor the increased burstiness of CA1 during the second  
234 postnatal week. It is worth noting that pairwise correlations of CA1 PCs found here are  
235 considerably lower than previously reported for the neonatal neocortex (Golshani et al.,  
236 2009). This prompted us to analyze the spatial structure of CA1 ensemble dynamics. We  
237 found that the dependence of STTCs on the Euclidean somatic distance was weak already  
238 during the first two postnatal weeks and non-significant at P18 (Fig. 4H), indicating that the  
239 horizontal confinement of patterned network activity is weak or absent in CA1.  
240 Collectively, our data reveal that enhanced network burstiness during the second postnatal  
241 week is associated with a higher fraction of cells being significantly locked to the activity of the  
242 local network, while pairwise neuronal correlations are low.

243

#### 244 *Motifs of CA1 network activity undergo distinct developmental alterations*

245 Recurring spatiotemporal cellular activation patterns are a hallmark of network activity in the  
246 adult hippocampus *in vivo* (Villette et al., 2015). Whether such repeating patterns (hereafter  
247 referred to as ‘motifs’) are already present at early developmental stages is unknown. To  
248 detect motifs, we divided the recording time into non-overlapping bins, each represented by a  
249 binary spatial pattern (vector) of active and inactive cells, followed by computing the matching  
250 index matrix of all possible pattern pairs (Fig. 5A). We then applied an eigendecomposition-  
251 based clustering method to each similarity matrix in order to detect potential motifs, while  
252 testing for their significance using surrogate data (see Methods). First, this analysis revealed  
253 that the global similarity of the activation patterns was lowest at P11 (Fig. 5B, Table S5),  
254 whereas it was similar between P4 and P18. This finding implies that there is less  
255 commonality between the sets of active cells present in different patterns at P11, and thus a

256 more random recruitment of cells. Furthermore, we found that the number of motifs was  
257 significantly lower at P11 ( $2.5 \pm 0.9$ ) as compared to P4 ( $5.9 \pm 0.4$ ) and P18 ( $7.0 \pm 1.1$ ) (Fig.  
258 5C). When computing the fraction of patterns belonging to each motif, we found that the  
259 motifs had the highest repetition rate at P18 ( $32.0 \pm 4.7\%$ ), while there was no significant  
260 difference between P4 ( $17.8 \pm 1.2\%$ ) and P11 ( $16.6 \pm 5.9\%$ ) (Fig. 5D). Taken together, these  
261 results suggest that recurring cellular activation patterns become more stable only after the  
262 onset of environmental exploration.

263

264 *A neural network model with inhibitory GABA identifies intrinsic instability dynamics as a key*  
265 *to the emergence of network bursts*

266 Hitherto our analyses of experimental data revealed an unexpected bursting behavior of CA1  
267 PCs at P11, despite the developmental emergence of synaptic inhibition (Tyzio et al., 2007;  
268 Murata et al., 2020; Spoljaric et al., 2017), which we found to associate with their higher  
269 coupling to local network activity. However, the mechanisms governing *in vivo* network  
270 burstiness as well as its functional implications remain to be understood. Here, we provide  
271 mechanistic insights into these open questions by using computational network modeling and  
272 stability analysis techniques.

273 We employed a recurrent neural network (RNN) model of mean firing-activity rates of  
274 excitatory glutamatergic (PC) and inhibitory GABAergic (IN) cell populations ( $A_p$  and  $A_i$ ) with  
275 dynamic synaptic weights (Rahmati et al., 2017; Flossmann et al., 2019) (Fig. 6A). Here, we  
276 constrain the model with previously reported and our present experimental data obtained for  
277 P11: I) GABAergic synapses are considered to be inhibitory (Kirmse et al., 2015; Valeeva et  
278 al., 2016; Murata et al., 2020) and II) the spontaneous time-averaged  $A_p$  is effectively non-  
279 zero (Fig. 2C). We found that such a network operates under a bi-stable regime, where two

280 stable spontaneous fixed points (FPs) exist: one at a silent state ( $A_p = A_i = 0$  Hz) and the  
281 other at an active state ( $A_p \neq 0$  Hz and  $A_i \neq 0$  Hz; green dots in Fig. 6B). The ability of the  
282 network to embed the latter FP is mainly due to the stabilization function of inhibitory GABA  
283 (Rahmati et al., 2017; Latham et al., 2004). Strikingly, our simulations showed that the  
284 network can process a given input quite differently at the silent and active states, respectively  
285 (time points a and c in Fig. 6C). To this end, we applied a set of two excitatory inputs to the  
286 network's PC and IN populations ( $e_p$  and  $e_i$ ), resembling e.g. SPW-driven inputs to CA1 (Fig.  
287 6C). We set the input strengths and duration to be identical across the two states. We found  
288 that, when operating at the active state, the network activity monotonically decays back to this  
289 state, once the input ceases (Fig. 6C, a). However, at the silent state, input removal is  
290 followed by a transient profound surge in network activity (c in Fig. 6C). Hereafter, we refer to  
291 this supra-amplification activity as simulated NB (simNB), emulating experimentally observed  
292 NBs (Fig. 3).

293

#### 294 *Network state-dependency of simNB generation*

295 To disclose the mechanisms underlying this distinct behavior of the network at the silent and  
296 active state (Fig. 6C), we computed the corresponding steady-state  $A_i$ - $A_p$ -plane of the  
297 network, after freezing the slow short-term synaptic plasticity (STP) dynamics and, thus,  
298 synaptic weights (Frozen STP-RNNs), at either of these states separately (Fig. 6D). This  
299 analysis enables assessing the initial phase of network activity following an input perturbation.  
300 We found that, while operating at the silent state, the active state is not initially accessible to  
301 the network (lower panel in Fig. 6D). Instead, an unstable FP is present in the network's fast  
302 (i.e. firing activity) dynamics, which builds an amplification threshold around the attraction  
303 domain of the FP located at the silent state. This in turn allows for the emergence of simNBs:

304 A sufficiently strong perturbation, amenable to initially push the network activity beyond this  
305 threshold (i.e. to the amplification domain), will transiently expose the network to its intrinsic  
306 instability-driven dynamics, thereby effectively triggering a simNB (Fig. 6C, c). Note that this  
307 unstable FP is different from its counterpart in the full system (Fig. 6B) and is only visible in  
308 the network's fast dynamics. In particular, this FP is transient and disappears around the peak  
309 of the elicited simNB, mainly due to short-term synaptic depression (Rahmati et al., 2017).  
310 Unlike the silent state, the network frozen at the active state has no amplification domain, but  
311 instead two attraction domains pertaining to its FPs at silent and active states (upper panel in  
312 Fig. 6D). This explains the network's incapability of eliciting simNBs, when operating at the  
313 active state. Collectively, these results suggest that simNBs, initiated by the input, are mainly  
314 an expression of the network's intrinsic instability dynamics, where the silent periods of the  
315 network are a prerequisite for its emergence.

316  
317 *Input-strength dependency and internal deadline of state transitions*

318 What are the input requirements that allow the network to transition between the active and  
319 the silent states? First, we found that the silencing of the network in an active state requires  
320 specific ratios of excitatory input strengths to be delivered to its PC and IN populations (Figs.  
321 6E–G). In particular, the presence of GABAergic inhibition can effectively promote this  
322 transition, where otherwise a relatively much stronger  $e_p$  is required to silence the network  
323 solely (Fig. 6G). Furthermore, once silenced, pushing the network back to the active state is  
324 also dependent on input ratio (Figs. 6H–J). However, to make such a transition, the network  
325 becomes noticeably more selective about the input ratio (compare Figs. 6G and 6J). Besides,  
326 for both transitions, the proper ratios of the inputs are effectively determined by the  
327 approximated initial phase of the network response (Fig. 6D), and thus mainly dependent on

328 the synaptic weights right before the input arrival. In sum, these results suggest that proper  
329 input strengths onto the PC and IN populations, along with the inhibitory action of GABA, play  
330 key roles in the dynamic state transitioning of the network, thereby allowing for its burstiness.  
331 Considering the dynamics of synaptic weights in our model along with their significance for  
332 state transitions, we next investigated the impact of input timing (Fig. 7). Furthermore, we  
333 found that, once silenced by the first input, a deadline is formed for the network's transitioning  
334 back to the active state (dotted line in Figs. 7A, D, G, H). If the second input misses the  
335 deadline, the network will elicit a large-amplitude simNB, which is not able to converge to the  
336 active state any longer (Fig. 7D). Prior to this deadline and depending on the input ratio (Fig.  
337 6J), the network will either transition to the active state (Figs. 7A, 6H) or return to the silent  
338 state (Fig. 6I). Importantly, our analysis showed that this deadline is an internal property of the  
339 network and cannot be overruled by any input level (see below). Therefore, specific  
340 combinations of input ratio (Fig. 6J) and input timing (Fig. 7G) are required for transitioning to  
341 the active state. In addition, once the simNB failed to converge to the active state, the network  
342 will encounter a new deadline (see Fig. S1). In sum, these results imply that the silent state of  
343 the network can have *per se* different hidden sub-states, each with a specific input-encoding  
344 operating scheme.

345 Having found the intrinsic deadline as a main determinant for the type of network burst, we  
346 next investigated the origin of these different activity patterns: How does the network decide  
347 between transitioning to the active state and returning to the silent state? Remarkably, we  
348 found that the deadline for network transitioning to the active state is mechanistically  
349 dependent on the presence of a transient stable FP in its fast dynamics around the peak of  
350 the simNB. This can be seen in the two examples where the network receives the same input  
351 but at different inter-pulse intervals (IPIs), one preceding (Figs. 7A–C) and the other

352 exceeding the deadline (Figs. 7D–F). For both IPIs, at the time right before the second input  
353 (Figs. 7B, E), the Frozen RNNs only provide evidence for the emergence of simNB, but not  
354 for the state transition (note the presence of an amplification domain; pink area). Importantly,  
355 we found, however, that in the case of the shorter IPI, the network is able to form a transient,  
356 stable non-zero FP in its Frozen RNN, at the peak of the simNB (compare Figs. 7C and 7F).  
357 This FP can transiently attract the network’s activity towards itself, and as the activity evolves  
358 accordingly, it also changes its position in the corresponding updated Frozen STP-RNN, until  
359 eventually converging to its counterpart in the full system. Intuitively, this transient, stable FP  
360 can guide the network’s activity towards that of the full system (see the non-origin green dot in  
361 Fig. 6B). The temporal repositioning of this stable FP is due to the activity-dependency of the  
362 synaptic weights in our model. Besides, our findings show that the existence of this FP  
363 around the simNB peak is effectively determined by simNB size (Fig. 7G). If simNB size  
364 exceeds an internally determined threshold, the network cannot build such a transient stable  
365 FP due to a reduction of synaptic weights (Rahmati et al., 2017); consequently, the simNB will  
366 be attracted towards the silent state. In this line, Fig. 7G shows that simNB size is effectively  
367 determined by the IPI: The longer the IPI (thus, the silent period) is, the larger the simNB will  
368 be. Here, the IPI-dependency of the simNB size mainly reflects the slow recovery from short-  
369 term depression of excitatory synapses at the silent state (Fig. 7H).

370 In conclusion, our modeling results indicate that developing CA1 possesses multiple input-  
371 encoding schemes, which are effectively determined by three factors: 1) the input ratio, 2) the  
372 input timing, and 3) the non-linearity and dynamics of synaptic weights.



373  
374  
375  
376  
377  
378  
379  
380  
381  
382  
383  
384  
385  
386  
387  
388  
389  
390  
391  
392  
393  
394  
395  
396

## Discussion

### *Unique characteristics of network dynamics in developing CA1 in vivo*

Using *in vivo* two-photon  $\text{Ca}^{2+}$  imaging, we here reveal that cellular network dynamics in developing hippocampal CA1 differ from those previously observed in neocortical areas. Firstly, pairwise correlations of firing activities (Figs. 4D–G) were considerably lower than those in the visual (Rocheffort et al., 2009) or somatosensory (Golshani et al., 2009; Che et al., 2018; van der Bourg et al., 2017) cortex *in vivo*, pointing to a lower degree of neuronal synchrony in CA1. Similarly, the degree of neuronal co-activation was substantially lower than that during GDPs recorded in acute slices (Flossmann et al., 2019), supporting the view that the underlying dynamics differ markedly. Secondly, throughout the developmental period studied here, pairwise correlations of firing activity were only weakly dependent on the inter-somatic distance (Fig. 4H). Together with previous electrophysiological data demonstrating bilateral synchronization of CA1 MUA along the septal-temporal axis (Valeeva et al., 2020; Valeeva et al., 2019), these observations imply that network activity in the neonatal CA1 is less correlated on small, but more correlated on large spatial scales, as compared to neocortical areas. In other words, CA1 NBs tend to lack a sharp horizontal confinement typical of neocortical spindle bursts, which activate upper layer PCs in a columnar manner (Kummer et al., 2016; Kirmse et al., 2015). Wavefront-containing activity patterns appear to be necessary for the proper developmental refinement of topographic maps in neocortex (Cang et al., 2005; Li et al., 2013) and receptive field characteristics of visual cortical neurons (Albert et al., 2008). In this line, the peculiar spatial features of CA1 NBs in our data may reflect the absence of a clear topical macro-organization of the mature hippocampus (Bellistri et al., 2013).

397 *A role for intrinsic network instability and synaptic inhibition in the generation of synchronized*  
398 *network activity in CA1*

399 We demonstrate that CA1 PCs undergo a transient period of enhanced network synchrony in  
400 the second postnatal week, i.e. shortly before the onsets of pattern vision, active whisking and  
401 environmental exploration. This trajectory remarkably differs from what has been previously  
402 reported for the hippocampus *in vitro*, where GDPs disappear shortly after the first postnatal  
403 week. At this time, GABA-releasing INs already impose effective synaptic inhibition on CA1  
404 PCs (Tyzio et al., 2008; Spoljaric et al., 2017; Murata et al., 2020), implying that synchronized  
405 activity *in vivo* does not depend on a GABAergic excitatory drive (in contrast to GDPs).  
406 Synchronized CA1 activity in the second postnatal week exhibited a preferred frequency of  
407  $\sim 0.1\text{--}0.5$  Hz, indicating that NBs occur in a temporally non-random manner (Fig. 3). Strikingly,  
408 however, individual neurons were recruited more randomly at this age, as the number of  
409 significant motifs of network activity as well as their average repetition probability were lowest  
410 (Fig. 5). In addition, the firing of individual cells resembled a Poissonian process (Fig. 2), and  
411 pairwise neuronal correlations were lowest in the second postnatal week (Fig. 4). We here set  
412 out to explain these seemingly discordant experimental findings using data-informed  
413 computational modeling.

414 Capitalizing on a dynamic systems modeling approach, we show that a potential dynamical  
415 regime of the network that allows for the generation of synchronized activity in the presence  
416 of effective synaptic inhibition is bi-stability. We found that our network model is prone to an  
417 intrinsic instability, governed by a nonlinear interaction between its fast (firing) and slow  
418 (synaptic) dynamics. Such instability enables the model to over-amplify the input, even after  
419 its removal, and thus elicit network bursts (simNBs; Fig. 6). This indicates that a (sim)NB  
420 reflects a spatiotemporal trajectory of the network's intrinsic instability dynamics, which, due

421 to its nature, can recruit a random set of cells at random order within a specific time-window.  
422 The size of this set and the time-window are determined by the synaptic weights right before  
423 the input arrival (Rahmati et al., 2017). Importantly, the data-informed model mechanistically  
424 links strong population coupling to weak pairwise neuronal correlations, the close-to-random  
425 firing of individual PCs and the low number of network motifs – as we found experimentally for  
426 the second postnatal week.

427 What are the functional roles of burstiness and synaptic inhibition at this stage? Our model, in  
428 addition to its silent state, embeds a stable fixed point (or steady state) at non-zero low  
429 activity rates (Fig. 6B), in accordance with our recorded data. Theoretical studies showed that  
430 the presence of such a fixed point requires the stabilization function of inhibitory GABA  
431 (Rahmati et al., 2017; Latham et al., 2004; Ozeki et al., 2009; Tsodyks et al., 1997). At such a  
432 fixed point, the network can operate under an inhibition-stabilized regime, which may enable  
433 CA1 networks to begin performing complex computations (Latham et al., 2004; Tsodyks et al.,  
434 1997). The ability of the network to dynamically transition between its silent and active states  
435 in an input-dependent fashion (Fig. 6) renders the second postnatal week an early  
436 developmental stage toward forming hippocampal memory and cognition mechanisms, as  
437 found in adult hippocampal attractor networks (Rolls, 2007; Knierim et al., 2016; Hartley et al.,  
438 2014; see also Rahmati et al., 2017). This view is supported by (I) the existence of the  
439 internal deadlines as well as a delicate input–ratio and –timing dependency of successful  
440 state transitions and simNB generation and (II) the network's ability to store information in  
441 both the silent and active state through transient synaptic weights (Mongillo et al., 2008;  
442 Stokes, 2015; Barak et al., 2014) and persistent activity (Boran et al., 2019; Zylberberg et al.,  
443 2017), respectively. In this line, our modeling results further imply that the network's silent  
444 state has *per se* several dynamic operational sub-states, which keep track of input timing and

445 strength (Figs. 7 and S1) to produce proper network read-outs. Collectively, we postulate that  
446 the basis of CA1 encoding schemes is set in shortly before eye opening. Moreover, our data  
447 suggest that GDPs disappear due to improper synaptic inputs *in vitro* during the second  
448 postnatal week, when GABA actions switch to inhibitory (Murata et al., 2020; Valeeva et al.,  
449 2016).

450

#### 451 *Potential developmental functions of network bursts in the neonatal CA1*

452 Computational modeling suggests a mechanism, whereby CA1 undergoes extensive input-  
453 discrimination learning before eye opening. In this scenario, NBs serve as a feedback that  
454 informs individual CA1 PCs about functionally important characteristics of the synaptic input  
455 to the local network, including (I) the proper targeting ratio of excitatory PCs *versus* inhibitory  
456 GABAergic INs (Murata et al., 2020; Valeeva et al., 2016) and (II) the timing of inputs relative  
457 to the network's operational state. Interestingly, the developmental period of enhanced  
458 network burstiness coincides with a major surge of synaptogenesis in CA1 PCs (Kirov et al.,  
459 2004). The latter involves a net addition of synapses, but also functionally important  
460 anatomical rearrangements. Specifically, the formation of mature dendritic spines, which allow  
461 for electrical and metabolic compartmentalization of postsynaptic responses, commences  
462 only at around P10, by which time most glutamatergic synapses are rather localized to  
463 dendritic shafts (Fiala et al., 1998; Kirov et al., 2004). In addition to acting as potential  
464 synaptogenic stimuli (Kirov et al., 2004), NBs could thus be an important element underlying  
465 synaptic competition and pruning, for example, based on synchronization-dependent plasticity  
466 rules in nascent dendrites (Winnubst et al., 2015). Synchronized activity might therefore be  
467 causally related to the delayed development of skewed (approximately log-normal) firing rate  
468 distributions (Fig. 2) underlying sparse coding (Ikegaya et al., 2013; Yassin et al., 2010;

469 Trojanowski et al., 2020; Narayanan et al., 2012; Roxin et al., 2011) – an energy-efficient  
470 regime of input processing and information storage (Mizuseki et al., 2013). In accordance with  
471 the efficient coding hypothesis and seminal work in the visual system (Albert et al., 2008), we  
472 argue that one function of developing CA1 and, thus, NBs is to remove statistical redundancy  
473 in the multi-sensory place-field code, by making use of a learning scheme that uses both  
474 intrinsically and sensory-evoked activity already before environmental exploration.

475

## Acknowledgments

476 We thank Ina Ingrisch for excellent technical assistance. This work was supported by  
477 Individual Research Grants (KI 1816/6-1, KI 1816/7-1 to K.K., HO 2156/5-1, HO 2156/6-1 to  
478 K.H.), the Research Unit 3004 (KI 1816/5-1 to K.K., GE 2519/8-1, GE 2519/9-1 to C.G.), the  
479 Priority Program 1665 (HO 2156/3–1/2 to K.H., KI 1816/1–1/2 to K.K., KI 1638/3–1/2 to  
480 S.J.K.) and the CRC Transregio 166 (B2 to C.G., B3 to K.H., K.K.) of the German Research  
481 Foundation.

482

## Author Contributions

483 Conceptualization, K.K., K.H., V.R.; Methodology, J.G., K.K., V.R.; Formal Analysis, K.K.,  
484 J.G., V.R.; Investigation, J.G., K.K., V.R., M.M.; Computational modeling, V.R.; Writing –  
485 Original Draft, K.K., V.R., J.G.; Writing – Review & Editing, J.G., V.R., M.M., O.W.W., C.G.,  
486 S.J.K., K.H., K.K.; Supervision, K.K., K.H., O.W.W., S.J.K., C.G.; Funding Acquisition, K.K.,  
487 K.H., O.W.W., S.J.K., C.G.

488

## **Declaration of Interests**

489 The authors declare no competing interests.



490

## References

- 491 Albert, M.V., Schnabel, A., and Field, D.J. (2008). Innate visual learning through spontaneous  
492 activity patterns. *PLoS Comput Biol* 4, e1000137.
- 493 Barak, O., and Tsodyks, M. (2014). Working models of working memory. *Curr Opin Neurobiol*  
494 25, 20-24.
- 495 Bellistri, E., Aguilar, J., Brotons-Mas, J.R., Foffani, G., and de la Prida, L.M. (2013). Basic  
496 properties of somatosensory-evoked responses in the dorsal hippocampus of the rat. *J*  
497 *Physiol* 591, 2667-2686.
- 498 Ben-Ari, Y., Cherubini, E., Corradetti, R., and Gaiarsa, J.L. (1989). Giant synaptic potentials in  
499 immature rat CA3 hippocampal neurones. *J Physiol* 416, 303-325.
- 500 Blanquie, O., Yang, J.W., Kilb, W., Sharopov, S., Sinning, A., and Luhmann, H.J. (2017).  
501 Electrical activity controls area-specific expression of neuronal apoptosis in the mouse  
502 developing cerebral cortex. *Elife* 6, e27696.
- 503 Boran, E., Fedele, T., Klaver, P., Hilfiker, P., Stieglitz, L., Grunwald, T., and Sarnthein, J.  
504 (2019). Persistent hippocampal neural firing and hippocampal-cortical coupling predict verbal  
505 working memory load. *Sci Adv* 5, eaav3687.
- 506 Cang, J., Renteria, R.C., Kaneko, M., Liu, X., Copenhagen, D.R., and Stryker, M.P. (2005).  
507 Development of precise maps in visual cortex requires patterned spontaneous activity in the  
508 retina. *Neuron* 48, 797-809.
- 509 Che, A., Babij, R., Iannone, A.F., Fetcho, R.N., Ferrer, M., Liston, C., Fishell, G., and De  
510 Marco Garcia, N.V. (2018). Layer I Interneurons Sharpen Sensory Maps during Neonatal  
511 Development. *Neuron* 99, 98-116 e117.
- 512 Chen, Y., Jang, H., Spratt, P.W.E., Kosar, S., Taylor, D.E., Essner, R.A., Bai, L., Leib, D.E.,  
513 Kuo, T.W., Lin, Y.C., *et al.* (2020). Soma-Targeted Imaging of Neural Circuits by Ribosome  
514 Tethering. *Neuron* 107, 454-469 e456.
- 515 Clements, J.D., and Bekkers, J.M. (1997). Detection of spontaneous synaptic events with an  
516 optimally scaled template. *Biophys J* 73, 220-229.
- 517 Colonnese, M.T., Kaminska, A., Minlebaev, M., Milh, M., Bloem, B., Lescure, S., Moriette, G.,  
518 Chiron, C., Ben-Ari, Y., and Khazipov, R. (2010). A conserved switch in sensory processing  
519 prepares developing neocortex for vision. *Neuron* 67, 480-498.
- 520 Cutts, C.S., and Eglon, S.J. (2014). Detecting pairwise correlations in spike trains: an  
521 objective comparison of methods and application to the study of retinal waves. *The Journal of*  
522 *neuroscience : the official journal of the Society for Neuroscience* 34, 14288-14303.
- 523 Del Rio-Bermudez, C., Kim, J., Sokoloff, G., and Blumberg, M.S. (2020). Active Sleep  
524 Promotes Coherent Oscillatory Activity in the Cortico-Hippocampal System of Infant Rats.  
525 *Cereb Cortex* 30, 2070-2082.

- 526 Denis, J., Dard, R.F., Quiroli, E., Cossart, R., and Picardo, M.A. (2020). DeepCINAC: A Deep-  
527 Learning-Based Python Toolbox for Inferring Calcium Imaging Neuronal Activity Based on  
528 Movie Visualization. *eNeuro* 7.
- 529 Dzhala, V.I., Talos, D.M., Sdrulla, D.A., Brumback, A.C., Mathews, G.C., Benke, T.A., Delpire,  
530 E., Jensen, F.E., and Staley, K.J. (2005). NKCC1 transporter facilitates seizures in the  
531 developing brain. *Nat Med* 11, 1205-1213.
- 532 Fiala, J.C., Feinberg, M., Popov, V., and Harris, K.M. (1998). Synaptogenesis via dendritic  
533 filopodia in developing hippocampal area CA1. *The Journal of neuroscience : the official  
534 journal of the Society for Neuroscience* 18, 8900-8911.
- 535 Flossmann, T., Kaas, T., Rahmati, V., Kiebel, S.J., Witte, O.W., Holthoff, K., and Kirmse, K.  
536 (2019). Somatostatin Interneurons Promote Neuronal Synchrony in the Neonatal  
537 Hippocampus. *Cell Rep* 26, 3173-3182.
- 538 Garaschuk, O., Hanse, E., and Konnerth, A. (1998). Developmental profile and synaptic origin  
539 of early network oscillations in the CA1 region of rat neonatal hippocampus. *J Physiol* 507 ( Pt  
540 1), 219-236.
- 541 Golshani, P., Goncalves, J.T., Khoshkhoo, S., Mostany, R., Smirnakis, S., and Portera-  
542 Cailliau, C. (2009). Internally mediated developmental desynchronization of neocortical  
543 network activity. *The Journal of neuroscience : the official journal of the Society for  
544 Neuroscience* 29, 10890-10899.
- 545 Gorski, J.A., Talley, T., Qiu, M., Puelles, L., Rubenstein, J.L., and Jones, K.R. (2002). Cortical  
546 excitatory neurons and glia, but not GABAergic neurons, are produced in the Emx1-  
547 expressing lineage. *The Journal of neuroscience : the official journal of the Society for  
548 Neuroscience* 22, 6309-6314.
- 549 Graf, J., Zhang, C., Marguet, S.L., Herrmann, T., Flossmann, T., Hinsch, R., Rahmati, V.,  
550 Guenther, M., Frahm, C., Urbach, A., *et al.* (2021). A limited role of NKCC1 in telencephalic  
551 glutamatergic neurons for developing hippocampal network dynamics and behavior. *Proc Natl  
552 Acad Sci U S A* 118.
- 553 Gretenkord, S., Kostka, J.K., Hartung, H., Watznauer, K., Fleck, D., Minier-Toribio, A., Spehr,  
554 M., and Hanganu-Opatz, I.L. (2019). Coordinated electrical activity in the olfactory bulb gates  
555 the oscillatory entrainment of entorhinal networks in neonatal mice. *PLoS Biol* 17, e2006994.
- 556 Hartley, T., Lever, C., Burgess, N., and O'Keefe, J. (2014). Space in the brain: how the  
557 hippocampal formation supports spatial cognition. *Philos Trans R Soc Lond B Biol Sci* 369,  
558 20120510.
- 559 Holt, G.R., Softky, W.R., Koch, C., and Douglas, R.J. (1996). Comparison of discharge  
560 variability in vitro and in vivo in cat visual cortex neurons. *J Neurophysiol* 75, 1806-1814.
- 561 Ikegaya, Y., Sasaki, T., Ishikawa, D., Honma, N., Tao, K., Takahashi, N., Minamisawa, G.,  
562 Ujita, S., and Matsuki, N. (2013). Interpyramid spike transmission stabilizes the sparseness of  
563 recurrent network activity. *Cereb Cortex* 23, 293-304.

- 564 Karlsson, K.A., Mohs, E.J., di Prisco, G.V., and Blumberg, M.S. (2006). On the co-  
565 occurrence of startles and hippocampal sharp waves in newborn rats. *Hippocampus* 16, 959-  
566 965.
- 567 Kerr, J.N., Greenberg, D., and Helmchen, F. (2005). Imaging input and output of neocortical  
568 networks in vivo. *Proc Natl Acad Sci U S A* 102, 14063-14068.
- 569 Khazipov, R., Khalilov, I., Tyzio, R., Morozova, E., Ben-Ari, Y., and Holmes, G.L. (2004).  
570 Developmental changes in GABAergic actions and seizure susceptibility in the rat  
571 hippocampus. *The European journal of neuroscience* 19, 590-600.
- 572 Kirkby, L.A., Sack, G.S., Firl, A., and Feller, M.B. (2013). A role for correlated spontaneous  
573 activity in the assembly of neural circuits. *Neuron* 80, 1129-1144.
- 574 Kirmse, K., Kummer, M., Kovalchuk, Y., Witte, O.W., Garaschuk, O., and Holthoff, K. (2015).  
575 GABA depolarizes immature neurons and inhibits network activity in the neonatal neocortex in  
576 vivo. *Nature communications* 6, 7750.
- 577 Kirov, S.A., Goddard, C.A., and Harris, K.M. (2004). Age-dependence in the homeostatic  
578 upregulation of hippocampal dendritic spine number during blocked synaptic transmission.  
579 *Neuropharmacology* 47, 640-648.
- 580 Knierim, J.J., and Neunuebel, J.P. (2016). Tracking the flow of hippocampal computation:  
581 Pattern separation, pattern completion, and attractor dynamics. *Neurobiol Learn Mem* 129,  
582 38-49.
- 583 Kruskal, P.B., Stanis, J.J., McNaughton, B.L., and Thomas, P.J. (2007). A binless correlation  
584 measure reduces the variability of memory reactivation estimates. *Stat Med* 26, 3997-4008.
- 585 Kummer, M., Kirmse, K., Witte, O.W., Haueisen, J., and Holthoff, K. (2015). Method to  
586 quantify accuracy of position feedback signals of a three-dimensional two-photon laser-  
587 scanning microscope. *Biomed Opt Express* 6, 3678-3693.
- 588 Kummer, M., Kirmse, K., Witte, O.W., and Holthoff, K. (2012). Reliable in vivo identification of  
589 both GABAergic and glutamatergic neurons using Emx1-Cre driven fluorescent reporter  
590 expression. *Cell Calcium* 52, 182-189.
- 591 Kummer, M., Kirmse, K., Zhang, C., Haueisen, J., Witte, O.W., and Holthoff, K. (2016).  
592 Column-like Ca(2+) clusters in the mouse neonatal neocortex revealed by three-dimensional  
593 two-photon Ca(2+) imaging in vivo. *NeuroImage* 138, 64-75.
- 594 Latham, P.E., and Nirenberg, S. (2004). Computing and stability in cortical networks. *Neural*  
595 *Comput* 16, 1385-1412.
- 596 Leinekugel, X., Khazipov, R., Cannon, R., Hirase, H., Ben-Ari, Y., and Buzsaki, G. (2002).  
597 Correlated bursts of activity in the neonatal hippocampus in vivo. *Science* 296, 2049-2052.
- 598 Leinekugel, X., Medina, I., Khalilov, I., Ben-Ari, Y., and Khazipov, R. (1997). Ca<sup>2+</sup> oscillations  
599 mediated by the synergistic excitatory actions of GABA(A) and NMDA receptors in the  
600 neonatal hippocampus. *Neuron* 18, 243-255.

- 601 Li, H., Fertuzinhos, S., Mohns, E., Hnasko, T.S., Verhage, M., Edwards, R., Sestan, N., and  
602 Crair, M.C. (2013). Laminar and columnar development of barrel cortex relies on  
603 thalamocortical neurotransmission. *Neuron* 79, 970-986.
- 604 Li, X., Ouyang, G., Usami, A., Ikegaya, Y., and Sik, A. (2010). Scale-free topology of the CA3  
605 hippocampal network: a novel method to analyze functional neuronal assemblies. *Biophys J*  
606 98, 1733-1741.
- 607 Maset, A., Galla, L., Francia, S., Cozzolino, O., Capasso, P., Goisis, R.C., Losi, G.,  
608 Lombardo, A., Ratto, G.M., and Lodovichi, C. (2021). Altered Cl(-) homeostasis hinders  
609 forebrain GABAergic interneuron migration in a mouse model of intellectual disability. *Proc*  
610 *Natl Acad Sci U S A* 118.
- 611 Mizrahi, A., Crowley, J.C., Shtoyerman, E., and Katz, L.C. (2004). High-resolution in vivo  
612 imaging of hippocampal dendrites and spines. *The Journal of neuroscience : the official*  
613 *journal of the Society for Neuroscience* 24, 3147-3151.
- 614 Mizuseki, K., and Buzsaki, G. (2013). Preconfigured, skewed distribution of firing rates in the  
615 hippocampus and entorhinal cortex. *Cell Rep* 4, 1010-1021.
- 616 Molnar, Z., Luhmann, H.J., and Kanold, P.O. (2020). Transient cortical circuits match  
617 spontaneous and sensory-driven activity during development. *Science* 370.
- 618 Mongillo, G., Barak, O., and Tsodyks, M. (2008). Synaptic theory of working memory. *Science*  
619 319, 1543-1546.
- 620 Murata, Y., and Colonnese, M.T. (2020). GABAergic interneurons excite neonatal  
621 hippocampus in vivo. *Science Advances* 6.
- 622 Narayanan, R., and Johnston, D. (2012). Functional maps within a single neuron. *J*  
623 *Neurophysiol* 108, 2343-2351.
- 624 Nguyen, Q.T., Tsai, P.S., and Kleinfeld, D. (2006). MPscope: a versatile software suite for  
625 multiphoton microscopy. *J Neurosci Methods* 156, 351-359.
- 626 Oh, W.C., Lutz, S., Castillo, P.E., and Kwon, H.B. (2016). De novo synaptogenesis induced  
627 by GABA in the developing mouse cortex. *Science* 353, 1037-1040.
- 628 Okun, M., Steinmetz, N., Cossell, L., Iacaruso, M.F., Ko, H., Bartho, P., Moore, T., Hofer,  
629 S.B., Mrcic-Flogel, T.D., Carandini, M., and Harris, K.D. (2015). Diverse coupling of neurons  
630 to populations in sensory cortex. *Nature* 521, 511-515.
- 631 Owens, D.F., Boyce, L.H., Davis, M.B., and Kriegstein, A.R. (1996). Excitatory GABA  
632 responses in embryonic and neonatal cortical slices demonstrated by gramicidin perforated-  
633 patch recordings and calcium imaging. *The Journal of neuroscience : the official journal of the*  
634 *Society for Neuroscience* 16, 6414-6423.
- 635 Ozeki, H., Finn, I.M., Schaffer, E.S., Miller, K.D., and Ferster, D. (2009). Inhibitory stabilization  
636 of the cortical network underlies visual surround suppression. *Neuron* 62, 578-592.

- 637 Patel, T.P., Man, K., Firestein, B.L., and Meaney, D.F. (2015). Automated quantification of  
638 neuronal networks and single-cell calcium dynamics using calcium imaging. *J Neurosci*  
639 *Methods* 243, 26-38.
- 640 Pnevmatikakis, E.A., and Giovannucci, A. (2017). NoRMCorre: An online algorithm for  
641 piecewise rigid motion correction of calcium imaging data. *J Neurosci Methods* 291, 83-94.
- 642 Ponce-Alvarez, A., Kilavik, B.E., and Riehle, A. (2010). Comparison of local measures of  
643 spike time irregularity and relating variability to firing rate in motor cortical neurons. *J Comput*  
644 *Neurosci* 29, 351-365.
- 645 Rahmati, V., Kirmse, K., Holthoff, K., and Kiebel, S.J. (2018). Ultra-fast accurate  
646 reconstruction of spiking activity from calcium imaging data. *J Neurophysiol* 119, 1863-1878.
- 647 Rahmati, V., Kirmse, K., Holthoff, K., Schwabe, L., and Kiebel, S.J. (2017). Developmental  
648 Emergence of Sparse Coding: A Dynamic Systems Approach. *Sci Rep* 7, 13015.
- 649 Rochefort, N.L., Garaschuk, O., Milos, R.I., Narushima, M., Marandi, N., Pichler, B.,  
650 Kovalchuk, Y., and Konnerth, A. (2009). Sparsification of neuronal activity in the visual cortex  
651 at eye-opening. *Proc Natl Acad Sci U S A* 106, 15049-15054.
- 652 Rolls, E.T. (2007). An attractor network in the hippocampus: theory and neurophysiology.  
653 *Learn Mem* 14, 714-731.
- 654 Romano, S.A., Pietri, T., Perez-Schuster, V., Jouary, A., Haudrechy, M., and Sumbre, G.  
655 (2015). Spontaneous neuronal network dynamics reveal circuit's functional adaptations for  
656 behavior. *Neuron* 85, 1070-1085.
- 657 Roxin, A., Brunel, N., Hansel, D., Mongillo, G., and van Vreeswijk, C. (2011). On the  
658 distribution of firing rates in networks of cortical neurons. *The Journal of neuroscience : the*  
659 *official journal of the Society for Neuroscience* 31, 16217-16226.
- 660 Sando, R., Bushong, E., Zhu, Y., Huang, M., Considine, C., Phan, S., Ju, S., Uytiepo, M.,  
661 Ellisman, M., and Maximov, A. (2017). Assembly of Excitatory Synapses in the Absence of  
662 Glutamatergic Neurotransmission. *Neuron* 94, 312-321 e313.
- 663 Spoljaric, A., Seja, P., Spoljaric, I., Virtanen, M.A., Lindfors, J., Uvarov, P., Summanen, M.,  
664 Crow, A.K., Hsueh, B., Puskarjov, M., *et al.* (2017). Vasopressin excites interneurons to  
665 suppress hippocampal network activity across a broad span of brain maturity at birth. *Proc*  
666 *Natl Acad Sci U S A* 114, E10819-E10828.
- 667 Spoljaric, I., Spoljaric, A., Mavrovic, M., Seja, P., Puskarjov, M., and Kaila, K. (2019). KCC2-  
668 Mediated Cl(-) Extrusion Modulates Spontaneous Hippocampal Network Events in Perinatal  
669 Rats and Mice. *Cell Rep* 26, 1073-1081 e1073.
- 670 Sporns, O., Honey, C.J., and Kotter, R. (2007). Identification and classification of hubs in  
671 brain networks. *PLoS One* 2, e1049.
- 672 Stokes, M.G. (2015). 'Activity-silent' working memory in prefrontal cortex: a dynamic coding  
673 framework. *Trends Cogn Sci* 19, 394-405.

- 674 Sun, S., Babola, T., Pregernig, G., So, K.S., Nguyen, M., Su, S.M., Palermo, A.T., Bergles,  
675 D.E., Burns, J.C., and Muller, U. (2018). Hair Cell Mechanotransduction Regulates  
676 Spontaneous Activity and Spiral Ganglion Subtype Specification in the Auditory System. *Cell*  
677 *174*, 1247-1263 e1215.
- 678 Sweeney, Y., and Clopath, C. (2020). Population coupling predicts the plasticity of stimulus  
679 responses in cortical circuits. *Elife* *9*.
- 680 Trojanowski, N.F., Bottorff, J., and Turrigiano, G.G. (2020). Activity labeling in vivo using  
681 CaMPARI2 reveals intrinsic and synaptic differences between neurons with high and low  
682 firing rate set points. *Neuron*.
- 683 Tsodyks, M., Pawelzik, K., and Markram, H. (1998). Neural networks with dynamic synapses.  
684 *Neural Comput* *10*, 821-835.
- 685 Tsodyks, M.V., Skaggs, W.E., Sejnowski, T.J., and McNaughton, B.L. (1997). Paradoxical  
686 effects of external modulation of inhibitory interneurons. *The Journal of neuroscience : the*  
687 *official journal of the Society for Neuroscience* *17*, 4382-4388.
- 688 Tyzio, R., Holmes, G.L., Ben-Ari, Y., and Khazipov, R. (2007). Timing of the developmental  
689 switch in GABA(A) mediated signaling from excitation to inhibition in CA3 rat hippocampus  
690 using gramicidin perforated patch and extracellular recordings. *Epilepsia* *48 Suppl 5*, 96-105.
- 691 Tyzio, R., Minlebaev, M., Rheims, S., Ivanov, A., Jorquera, I., Holmes, G.L., Zilberter, Y.,  
692 Ben-Ari, Y., and Khazipov, R. (2008). Postnatal changes in somatic gamma-aminobutyric acid  
693 signalling in the rat hippocampus. *The European journal of neuroscience* *27*, 2515-2528.
- 694 Valeeva, G., Nasretdinov, A., Rychkova, V., and Khazipov, R. (2019). Bilateral  
695 Synchronization of Hippocampal Early Sharp Waves in Neonatal Rats. *Front Cell Neurosci*  
696 *13*, 29.
- 697 Valeeva, G., Rychkova, V., Vinokurova, D., Nasretdinov, A., and Khazipov, R. (2020). Early  
698 sharp wave synchronization along the septo-temporal axis of the neonatal rat hippocampus.  
699 *ЖУРНАЛ ВЫСШЕЙ НЕРВНОЙ ДЕЯТЕЛЬНОСТИ ИМ ИП ПАВЛОВА* *70*, 341-350.
- 700 Valeeva, G., Tressard, T., Mukhtarov, M., Baude, A., and Khazipov, R. (2016). An  
701 Optogenetic Approach for Investigation of Excitatory and Inhibitory Network GABA Actions in  
702 Mice Expressing Channelrhodopsin-2 in GABAergic Neurons. *The Journal of neuroscience :*  
703 *the official journal of the Society for Neuroscience* *36*, 5961-5973.
- 704 van der Bourg, A., Yang, J.W., Reyes-Puerta, V., Laurenczy, B., Wieckhorst, M., Stuttgen,  
705 M.C., Luhmann, H.J., and Helmchen, F. (2017). Layer-Specific Refinement of Sensory  
706 Coding in Developing Mouse Barrel Cortex. *Cereb Cortex* *27*, 4835-4850.
- 707 Villette, V., Malvache, A., Tressard, T., Dupuy, N., and Cossart, R. (2015). Internally  
708 Recurring Hippocampal Sequences as a Population Template of Spatiotemporal Information.  
709 *Neuron* *88*, 357-366.
- 710 Vitali, I., Fievre, S., Telley, L., Oberst, P., Bariselli, S., Frangeul, L., Baumann, N., McMahon,  
711 J.J., Klingler, E., Bocchi, R., *et al.* (2018). Progenitor Hyperpolarization Regulates the

- 712 Sequential Generation of Neuronal Subtypes in the Developing Neocortex. *Cell* *174*, 1264-  
713 1276 e1215.
- 714 Winnubst, J., Cheyne, J.E., Niculescu, D., and Lohmann, C. (2015). Spontaneous Activity  
715 Drives Local Synaptic Plasticity In Vivo. *Neuron* *87*, 399-410.
- 716 Wong, F.K., Bercsenyi, K., Sreenivasan, V., Portales, A., Fernandez-Otero, M., and Marin, O.  
717 (2018). Pyramidal cell regulation of interneuron survival sculpts cortical networks. *Nature* *557*,  
718 668-673.
- 719 Yamada, J., Okabe, A., Toyoda, H., Kilb, W., Luhmann, H.J., and Fukuda, A. (2004). Cl-  
720 uptake promoting depolarizing GABA actions in immature rat neocortical neurones is  
721 mediated by NKCC1. *J Physiol* *557*, 829-841.
- 722 Yassin, L., Benedetti, B.L., Jouhanneau, J.S., Wen, J.A., Poulet, J.F., and Barth, A.L. (2010).  
723 An embedded subnetwork of highly active neurons in the neocortex. *Neuron* *68*, 1043-1050.
- 724 Zhang, C., Yang, S., Flossmann, T., Gao, S., Witte, O.W., Nagel, G., Holthoff, K., and Kirmse,  
725 K. (2019). Optimized photo-stimulation of halorhodopsin for long-term neuronal inhibition.  
726 *BMC Biol* *17*, 95.
- 727 Zhang, J., Ackman, J.B., Xu, H.P., and Crair, M.C. (2011). Visual map development depends  
728 on the temporal pattern of binocular activity in mice. *Nature neuroscience* *15*, 298-307.
- 729 Zylberberg, J., and Strowbridge, B.W. (2017). Mechanisms of Persistent Activity in Cortical  
730 Circuits: Possible Neural Substrates for Working Memory. *Annu Rev Neurosci* *40*, 603-627.  
731

732

## Figures and legends

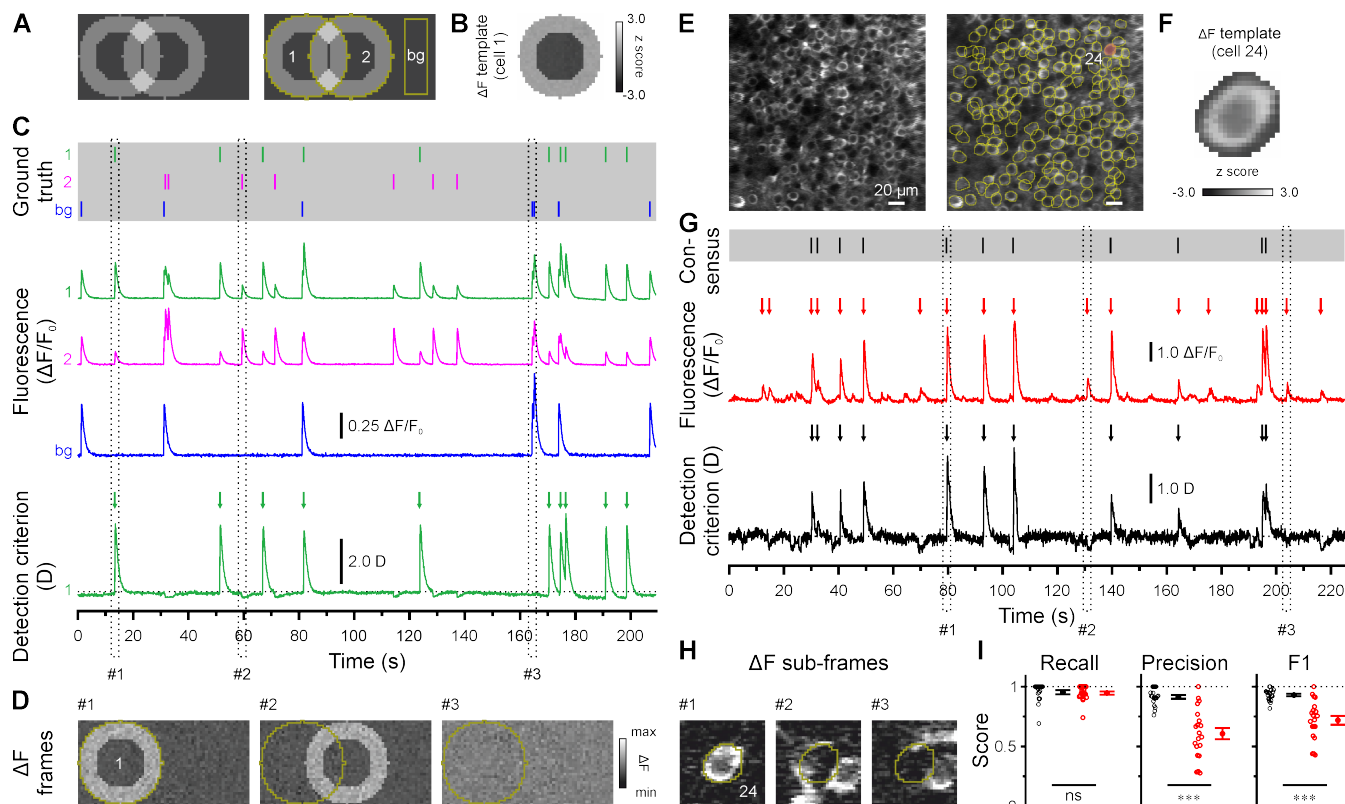

733

734 **Figure 1.** CATHARSiS enables reliable CaT detection in densely labeled tissue. (A) Resting  
 735 image of two partially overlapping simulated cells (*left*) and regions of interest (ROIs) used for  
 736 analysis (*right*). bg - background. (B)  $\Delta F$  template of cell 1. (C) *Top*, simulated trains of action  
 737 potentials. *Middle*, relative changes from baseline fluorescence ( $\Delta F/F_0$ ) of ROIs shown in A.  
 738 *Bottom*, detection criterion (D) for cell 1 and corresponding CaT onsets retrieved by  
 739 CATHARSiS (arrows). (D) Sample  $\Delta F$  images of three individual frames at time points  
 740 indicated in C. Spikes in cell 1 or 2 translated into ring-shaped increases in  $\Delta F$ , whereas  
 741 those induced by bg spikes were applied to the entire field of view. (E) Resting GCaMP6s  
 742 fluorescence image (*left*) and ROIs used for analysis (*right*). (F)  $\Delta F$  template of the cell  
 743 indicated in E. (G) *Top*, consensus visual annotation by two human experts for the same cell.  
 744 *Middle*,  $\Delta F/F_0$  and detected event onsets (red arrows). *Bottom*, detection criterion (D) and



745 corresponding CaT onsets retrieved by CATHARSiS (black arrows). (H) Sample  $\Delta F$  images of  
746 three individual frames at time points indicated in G. Note that frames #2 and #3 led to false  
747 positive results if event detection was performed on mean  $\Delta F$ , but not if performed on D. (I)  
748 Quantification of recall, precision and F1 score for event detection based on D (i.e.  
749 CATHARSiS) and mean  $\Delta F$ , respectively. Each open circle represents a single cell. Data are  
750 presented as mean  $\pm$  SEM. ns – not significant. \*\*\*  $P < 0.001$ . See also Table S1.

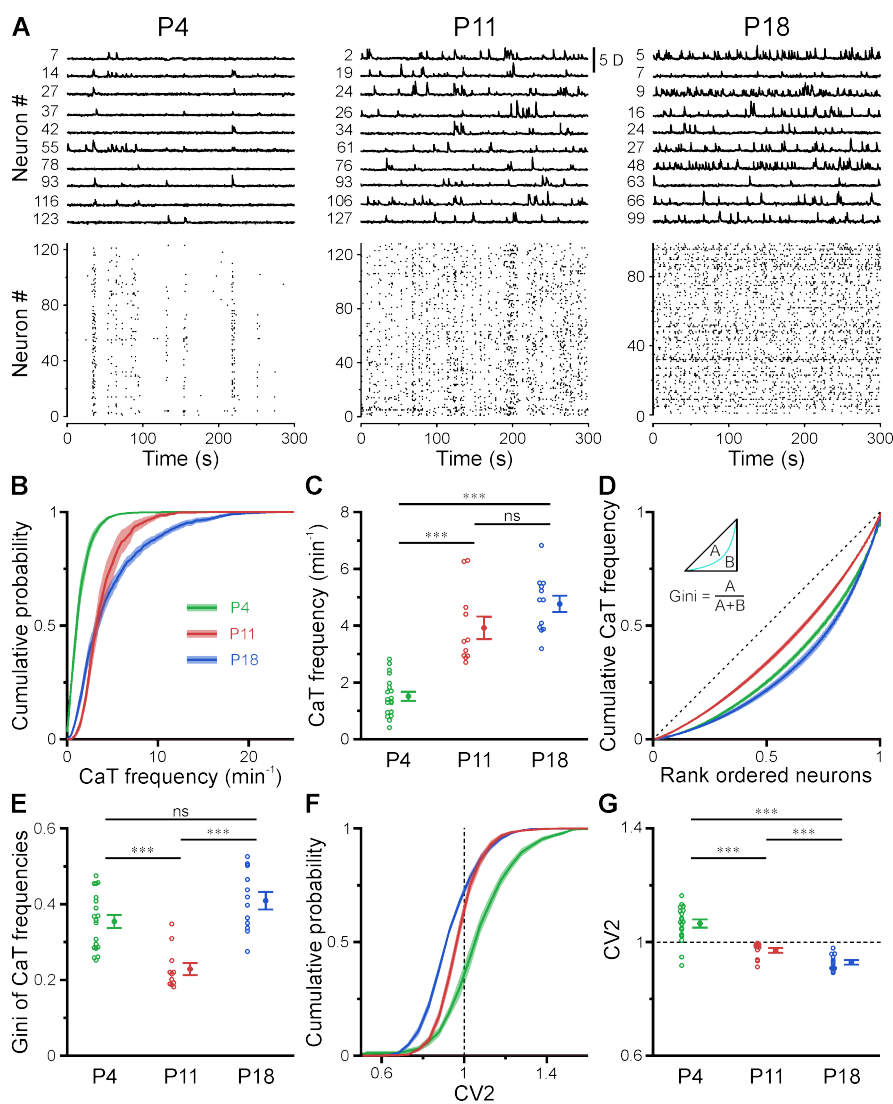

751

752 **Figure 2.** A transient period of firing equalization during CA1 development *in vivo*. (A) Sample  
 753  $D(t)$  traces (top) and raster plots showing reconstructed CaT onsets (bottom). Note that  
 754 cellular firing undergoes a developmental transition from synchronized-discontinuous to  
 755 desynchronized-continuous activity. (B) Cumulative probability of CaT frequencies. (C) Mean  
 756 CaT frequencies per FOV. (D) Lorenz curves of CaT frequencies. Line of equality (dotted)  
 757 represents the case that all neurons have equal CaT frequencies. Inset depicts Gini  
 758 coefficient calculation. (E) Mean Gini coefficients per FOV. (F) Cumulative probability of mean  
 759 CV2 of inter-CaT intervals. Note that, at P11, CV2 distribution is narrower and centered  
 760 around 1. (G) Mean CV2 per FOV. For a Poisson process, CV2 = 1 (dotted line). Each open

- 761 circle represents a single FOV. Data are presented as mean  $\pm$  SEM. ns – not significant. P4:  
762 P3–4, P11: P10–12, P18: P17–19, \*\*\*  $P < 0.001$ . See also Table S2.

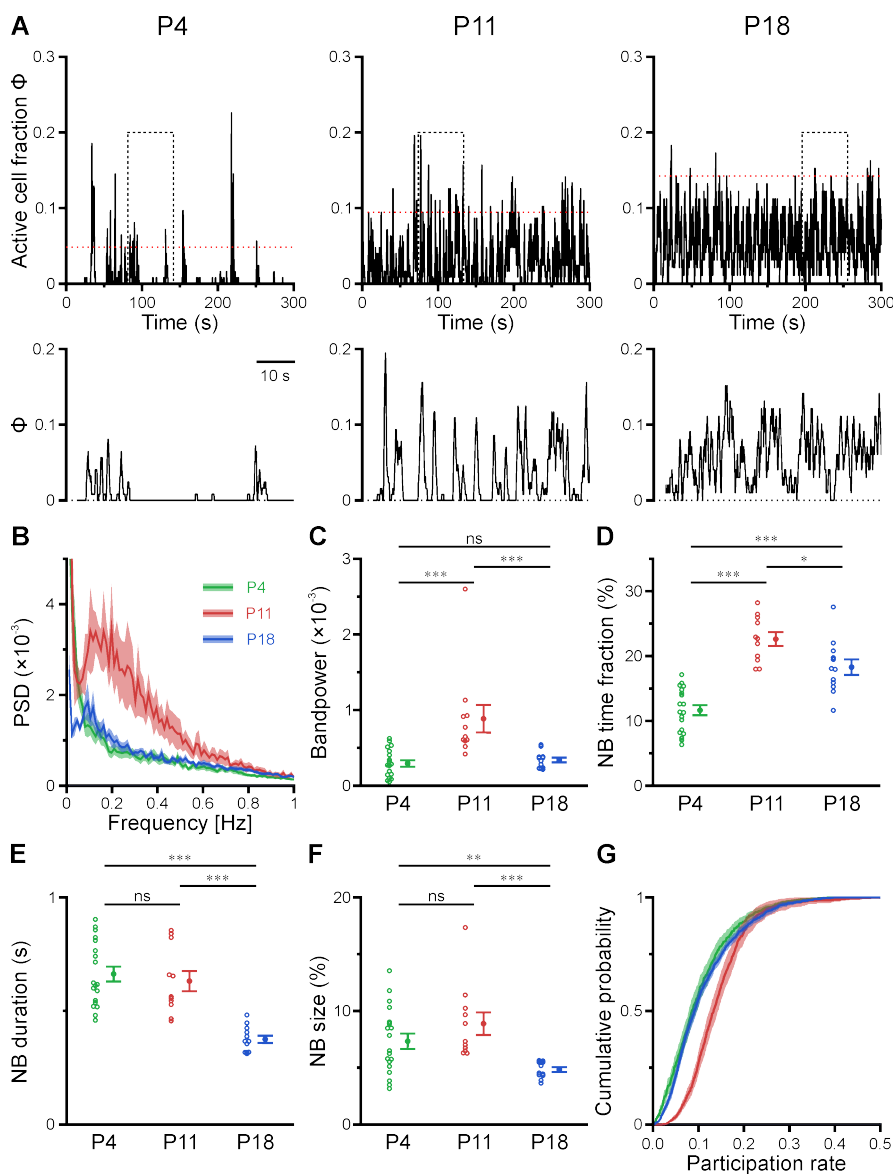

763

764 **Figure 3.** CA1 undergoes a transient enhanced bursting period *in vivo*. (A) Sample traces of  
765 the fraction of active cells  $\Phi(t)$ . Bottom traces show time periods marked on top (dotted  
766 rectangle) at higher temporal resolution. The red dotted line indicates the activity-dependent  
767 threshold for NB detection. (B) Power spectral density of  $\Phi(t)$ . (C) Bandpower of  $\Phi(t)$  in the  
768 0.1–0.5 Hz range. (D) The fraction of time that the network spent in NBs peaked at P11. (E)  
769 The average NB duration is lowest at P18. (F) Quantification of NB size as the mean fraction  
770 of active neurons (corrected for burst threshold as indicated in A). (G) Cumulative probability  
771 of the fraction of NBs that each cell is participating in. Each open circle represents a single

772 FOV. Data are presented as mean  $\pm$  SEM. ns – not significant. P4: P3–4, P11: P10–12, P18:  
773 P17–19, \*\*\*  $P < 0.001$ . \*\*  $P < 0.01$ . \*  $P < 0.05$ . See also Table S3.

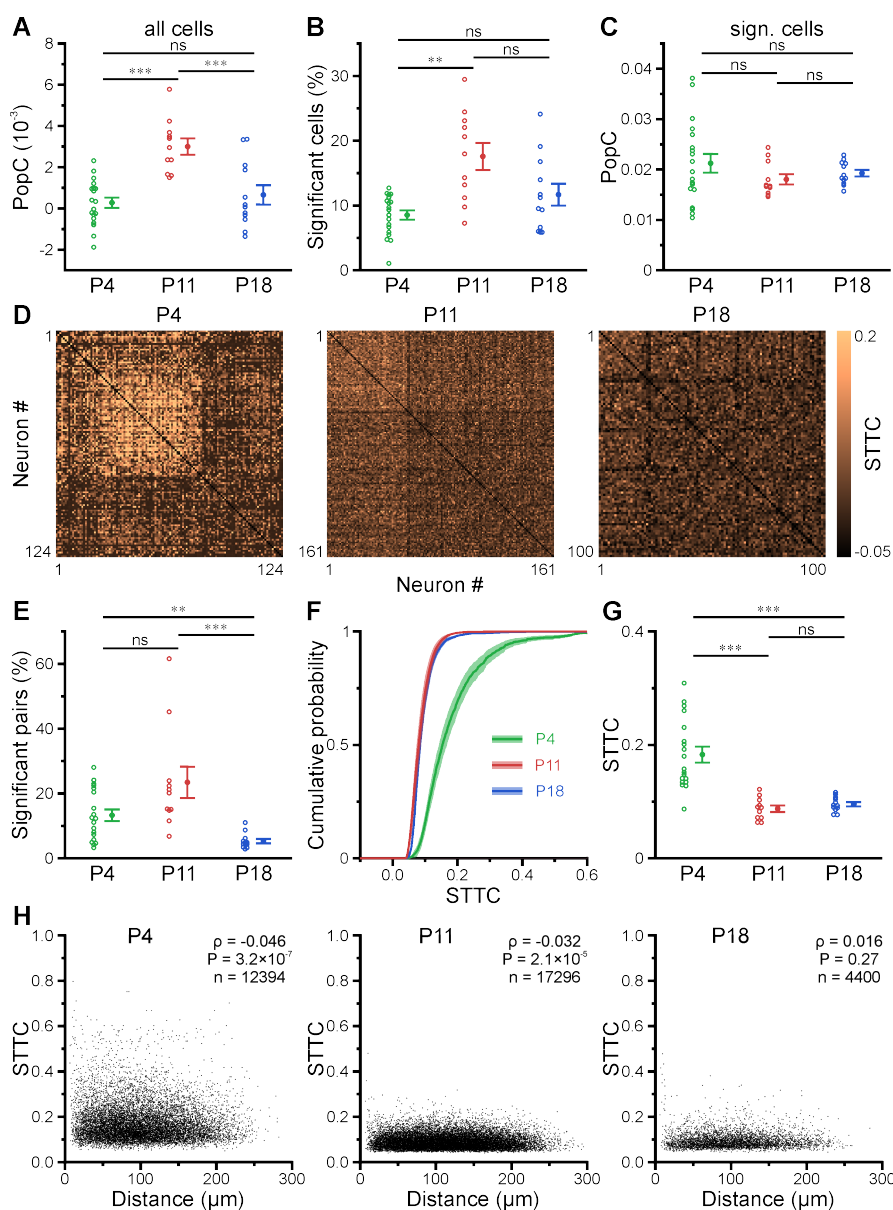

774

775 **Figure 4.** Enhanced population coupling underlies network burstiness in the second postnatal  
 776 week *in vivo*. (A) The mean population coupling (PopC) index peaked at P11. (B) Mean  
 777 fraction of cells with significant PopC. (C) Mean PopC index of significantly coupled cells only.  
 778 (D) Sample STTC matrices (re-ordered). (E) Mean fraction of cell pairs having a significant  
 779 STTC. (F) Cumulative probability of STTCs of significantly correlated cell pairs only. (G) Mean  
 780 STTCs of significantly correlated cell pairs. (H) Relationship between STTC and Euclidean  
 781 somatic distance for significantly correlated cell pairs.  $\rho$  denotes the Spearman's rank

782 correlation coefficient for all cell pairs analyzed (n) at a given age. Each open circle  
783 represents a single FOV. Data are presented as mean  $\pm$  SEM. ns – not significant. P4: P3–4,  
784 P11: P10–12, P18: P17–19, \*\*\*  $P < 0.001$ . \*\*  $P < 0.01$ . See also Table S4.

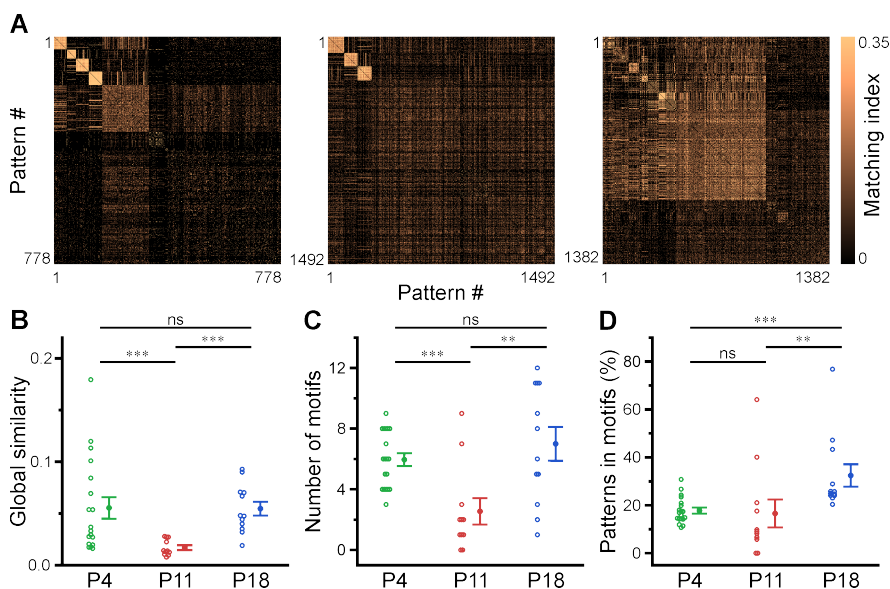

785

786 **Figure 5.** Motifs of CA1 network activity undergo distinct developmental alterations. (A)  
787 Similarity matrices (matching index) of binary activity patterns (re-ordered for illustration of  
788 motif detection). (B) Global similarity of activity patterns is lowest at P11. (C) The absolute  
789 number of detected motifs per FOV is lowest at P11. (D) Motif repetition quantified as the  
790 fraction of activity patterns belonging to each motif. Each open circle represents a single FOV.  
791 Data are presented as mean  $\pm$  SEM. ns – not significant. P4: P3–4, P11: P10–12, P18: P17–  
792 19, \*\*\*  $P < 0.001$ . \*\*  $P < 0.01$ . See also Table S5.



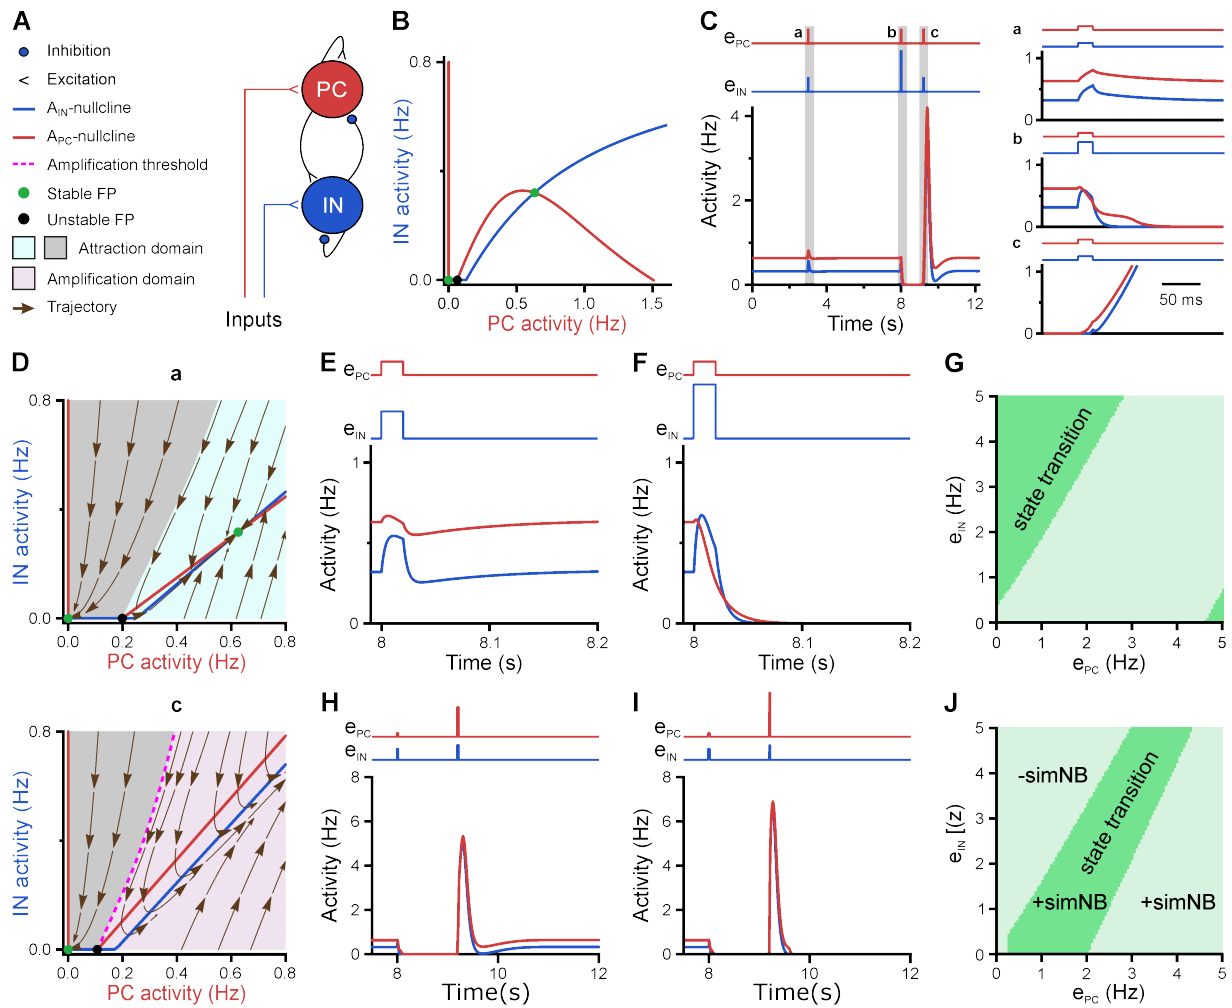

793

794 **Figure 6.** A neural network model with inhibitory GABA identifies intrinsic instability dynamics  
 795 as key to the emergence of network bursts. (A) Schematic diagram of the STP-RNN model.  
 796 (B) The  $A_I$ - $A_P$ -plane of the full STP-RNN's stationary dynamics. Note the presence of two  
 797 stable fixed points (FPs; green dots) at silent and active states as well as the unstable FP  
 798 (black dot). (C) simNB generation requires network silencing. The model was stimulated by  
 799 pulse-like input to both PC and IN populations for a duration of 0.020 s (at  $t = 3$  and  $9.2$  s:  
 800  $e_p = e_i = 0.25$ ; at  $t = 8$  s:  $e_p = 0.25$ ,  $e_i = 0.75$ ). Zoom-in of the activity around the stimulation  
 801 times at active (a and b) and silent (c) states are shown in right panels. Input time series are  
 802 shown on top of the plots. (D) The presence of an amplification domain in the initial phase of

803 network firing dynamics enables the emergence of simNBs. The  $A_I$ - $A_p$ -plane of the STP-RNN  
804 with synaptic efficacies frozen at active (a, top) and silent (b, bottom) states, right before input  
805 arrival. (E–G) Transition from active to silent state requires specific input ratios. Input  
806 delivered at  $t = 8$  s. (E) A failed transition:  $e_p = 0.25$ ,  $e_I = 0.5$ . (F) A successful transition:  
807  $e_p = 0.25$ ,  $e_I = 1$ . (G) A color-coded matrix of successful (dark green) and failed (light green)  
808 transitions to the silent state in response to different combinations of  $e_p$  and  $e_I$  amplitudes.  
809 (H–J) Both the transition from the silent to the active state and the simNB generation require  
810 specific input ratios. Input delivered at  $t = 9.2$  s. Same as E–G, but for the backward transition  
811 to the active state. +simNB and –simNB indicate the emergence and absence of bursts.

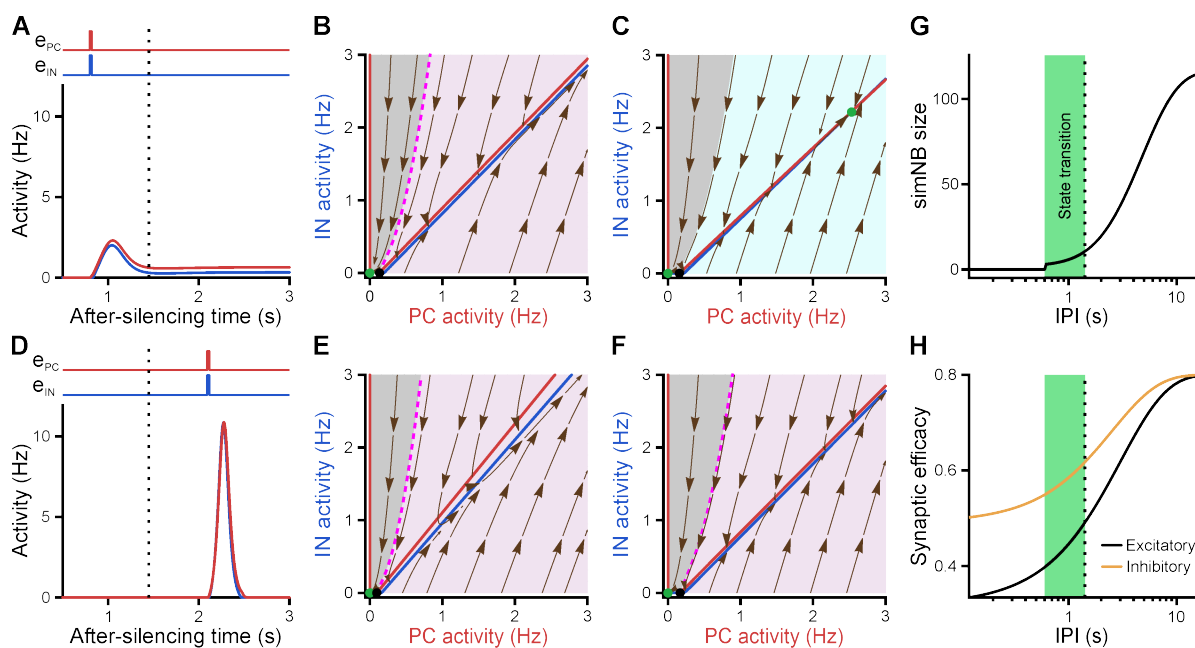

812

813 **Figure 7.** Internal deadline of state transitions. (A–C) Input delivered to the network before  
814 the deadline can move it to active state. (A) A successful transition. The input delivered at  $t =$   
815  $0.8$  s;  $e_p = 0.25$ ,  $e_i = 0.25$ . (B) The  $A_1$ - $A_p$ -plane of the STP-RNN with synaptic efficacies frozen  
816 at the silent state right before the input arrival. (C) Same as B, but frozen at the peak of the  
817 network burst (i.e. simNB) shown in A. Note the presence of the transient stable FP (non-  
818 origin green dot), which triggers the transitioning to the active state. (D–F) Once the deadline  
819 is missed, the network cannot be moved to the active state by the subsequent input. Same as  
820 A–C, but the input delivered at  $t = 2.1$  s. Note the absence of a non-origin transient stable FP  
821 in F, in contrast to C. (G) The simNB size and network transition to the active state depend on  
822 the inter-pulse intervals (IPI: the arrival time of the next input relative to the silencing time of  
823 the network). simNB size is computed as the maximum of  $A_1 + A_p$  after the secondary input.  
824 Note the presence of a short window for transitioning to the active state.  $e_p = 0.25$ ,  $e_i = 0.25$ .  
825 (H) Same as G, but for the non-scaled efficacies of GABAergic ( $u_i x_i$ ; orange; see Methods)  
826 and glutamatergic ( $u_p x_p$ ; black) synapses, right before the arrival of the secondary input. (A,

827 D, G, H) The dotted line at  $t = 1.45$  s depicts the internal deadline.

828

## Methods

829

### 830 **Animals**

831 All animal procedures were performed with approval of the local government (Thüringer  
832 Landesamt für Verbraucherschutz, Bad Langensalza, Germany) and complied with European  
833 Union norms (Directive 2010/63/EU). Animals were housed in standard cages with 14h/10h  
834 light/dark cycles. *Emx1*<sup>IRESc<sup>re</sup></sup> (stock no. 005628) and *GCaMP6s*<sup>LSL</sup> (Ai96, stock no. 024106)  
835 mice were originally obtained from The Jackson Laboratory. Double heterozygous offspring  
836 (*Emx1*<sup>IRESc<sup>re</sup>/wt</sup>;*GCaMP6s*<sup>LSL/wt</sup>) was used for experiments at P3–4 ('P4'), P10–12 ('P11') and  
837 P17–19 ('P18'). Mice of either sex were used.

838

### 839 **Surgical preparation, anesthesia and animal monitoring for in vivo imaging**

840 30 minutes before starting the preparation, 200 mg/kg metamizol (Novacen) was  
841 subcutaneously injected for analgesia. Animals were then placed onto a warm platform and  
842 anesthetized with isoflurane (3.5% for induction, 1–2% for maintenance) in pure oxygen (flow  
843 rate: 1 l/min). The skin overlying the skull was disinfected and locally infiltrated with 2%  
844 lidocaine (s.c.) for local analgesia. Eyes of P17–19 were lubricated with a drop of eye  
845 ointment (Vitamycin). Scalp and periosteum were removed, and a custom-made plastic  
846 chamber with a central borehole (Ø 2.5–4 mm) was fixed on the skull using cyanoacrylate  
847 glue (Uhu) (P4: 3.5 mm rostral from lambda and 1.5 mm lateral from midline; P11: 3.5 mm  
848 rostral from lambda and 2 mm lateral from midline; P18: 3.5 mm rostral from lambda and 2.5  
849 mm lateral from midline).

850 For the hippocampal window preparation (Mizrahi et al., 2004), the plastic chamber was  
851 tightly connected to a preparation stage and subsequently perfused with warm artificial

852 cerebrospinal fluid (ACSF) containing (in mM): 125 NaCl, 4 KCl, 25 NaHCO<sub>3</sub>, 1.25 NaH<sub>2</sub>PO<sub>4</sub>,  
853 2 CaCl<sub>2</sub>, 1 MgCl<sub>2</sub> and 10 glucose (pH 7.4, 35–36°C). A circular hole was drilled into the skull  
854 using a tissue punch (outer diameter 1.8 mm for P4 and 2.7 mm for P11 and P18 mice). The  
855 underlying cortical tissue and parts of corpus callosum were carefully removed by aspiration  
856 using a vacuum supply and a blunt 27G or 30G needle. Care was taken not to damage alveus  
857 fibers. As soon as bleeding stopped, the animal was transferred to the microscope stage.  
858 During *in vivo* recordings, body temperature was continuously monitored and maintained at  
859 close to physiological values (36–37°C) by means of a heating pad and a temperature sensor  
860 placed below the animal. Spontaneous respiration was monitored using a differential pressure  
861 amplifier (Spirometer Pod and PowerLab 4/35, ADInstruments). Isoflurane was discontinued  
862 after completion of the surgical preparation and gradually substituted with the analgesic-  
863 sedative nitrous oxide (up to the fixed final N<sub>2</sub>O/O<sub>2</sub> ratio of 3:1, flow rate: 1 l/min). Experiments  
864 started 60 min after withdrawal of isoflurane. At the end of each experiment, the animal was  
865 decapitated under deep isoflurane anesthesia.

866

### 867 ***Two photon Ca<sup>2+</sup> imaging in vivo***

868 After transferring the animal to the microscope stage, ACSF was removed and the  
869 hippocampal window was filled up with a droplet of agar (1%, in 0.9% NaCl) and covered with  
870 a cover glass. As soon as the agar solidified, the chamber was again perfused with ACSF.  
871 Imaging was performed using a Movable Objective Microscope (Sutter Instrument) equipped  
872 with two galvanometric scan mirrors (6210H, MicroMax 673XX Dual Axis Servo Driver,  
873 Cambridge Technology) and a piezo focusing unit (P-725.4CD PIFOC, E-665.CR amplifier,  
874 Physik Instrumente) controlled by a custom-made software written in LabVIEW 2010  
875 (National Instruments) (Kummer et al., 2015) and MPScope (Nguyen et al., 2006).

876 Fluorescence excitation at 920 nm was provided by a tunable Ti:Sapphire laser (Chameleon  
877 Ultra II, Coherent) using a 20×/1.0 NA water immersion objective (XLUMPLFLN 20XW,  
878 Olympus). Emission light was separated from excitation light using a 670-nm dichroic mirror  
879 (670 DCXXR, Chroma Technology), short-pass filtered at 680 nm and detected by a  
880 photomultiplier tube (12 bit, H10770PA-40, Hamamatsu). Data were acquired using two  
881 synchronized data acquisition devices (NI 6110, NI 6711, National Instruments). Sampling  
882 rate was set to 11.63 Hz (256×256 pixels, 248×248  $\mu\text{m}$ ). For each animal, spontaneous  
883 activity was recorded within 3–5 fields of view, each one usually for ~20 min.

884

## 885 ***Quantification and statistical analysis***

### 886 *Preprocessing*

887 Image stacks were registered using NoRMCorre (Pnevmatikakis et al., 2017). For residual  
888 drift detection, a supporting metric was calculated as the Pearson correlation coefficient of the  
889 binarized template image used for stack registration and the binarized images of the  
890 registered image stack. Time periods with residual drift were then visually identified (by  
891 inspecting the supporting metric and the aligned image stack) and considered as missing  
892 values in subsequent analyses. Raw regions of interest (ROIs) were manually drawn around  
893 the somata of individual CA1 PCs using Fiji.

894

### 895 *CATHARSiS – Calcium transient detection harnessing spatial similarity*

896 For the detection of CaTs in densely labeled tissue, we devised CATHARSiS (Calcium  
897 transient detection harnessing spatial similarity). CATHARSiS makes use of the fact that  
898 spike-induced somatic GCaMP signals ( $\Delta F$ ) are spatially non-uniform and characteristic of a  
899 given cell. CATHARSiS comprises three major steps: (1) the generation of a spatial  $\Delta F$

900 template representing the active cell, (2) the computation of a detection criterion  $D(t)$  for each  
901 time point (frame) and (3) the extraction of CaT onsets. All analyses were performed using  
902 custom scripts in Matlab and Fiji.

903 Ad (1): For each ROI, we first obtained the mean  $F(t)$  by frame-wise averaging across all  
904 pixels of that ROI. We then computed the first derivative of  $F(t)$  and smoothed it using a  
905 second order Savitzky-Golay algorithm (window length, 6 frames), thus yielding  $\dot{F}(t)$ . We then  
906 determined eight candidate CaT onsets by extracting the frame numbers corresponding to the  
907 eight  $\dot{F}(t)$  peaks having the largest amplitude. This step was performed in an iterative-  
908 descending manner by starting with the largest  $F(t)$  peak. For each peak, we defined a  
909 minimum time difference (5 frames) to all subsequently extracted peaks, so as to avoid  
910 extracting nearby frames belonging to the same CaT. For each candidate CaT onset, we then  
911 computed the corresponding spatial  $\Delta F$  (average of five successive frames). To this end, we  
912 first radially expanded the raw ROI by two pixels using the Euclidian distance transform (we  
913 found that this increased detection reliability due to enhanced spatial contrast). Resting  
914 fluorescence  $F_0(t)$  was defined as the moving median over 500 frames. Eight candidate  $\Delta F$   
915 templates were obtained by converting raw  $\Delta F$  values into z-scores. Based on visual  
916 inspection, we next rejected those candidate  $\Delta F$  templates that putatively reflected activation  
917 of optically overlapping somata and/or neurites. If all candidate  $\Delta F$  templates had been  
918 rejected, the cell was excluded from further analysis; otherwise, the remaining candidate  $\Delta F$   
919 templates were averaged to obtain the final  $\Delta F$  template representing the active cell.

920 Ad (2): For each ROI (spatially expanded as above), we extracted its spatial  $\Delta F$  for all frames  
921 in the image stack. Next, the spatial  $\Delta F$  template representing the active cell was optimally  
922 scaled to fit its  $\Delta F$  in each recorded frame. Based on the optimum scaling factor and the  
923 goodness of the fit, a detection criterion  $D(t)$  was computed for each time point. Here,  $D(t)$



924 was defined without modification as previously described for the temporal domain (Clements  
925 et al., 1997).

926 Ad (3): For each ROI, CaT onsets were extracted from  $D(t)$  using UFARSA, a general-  
927 purpose event detection routine (Rahmati et al., 2018). To this end, we slightly modified the  
928 original UFARSA approach in two ways. I) Following the smoothing step implemented in  
929 UFARSA, all negative values were set to zero, as we found in our preliminary analysis that  
930 negative-to-positive transitions occasionally resulted in false positive events. II) We  
931 introduced a lower bound for the leading threshold, so as to minimize potential false positive  
932 events. Reconstructed CaT onsets were translated into a binary activity vector and used for  
933 the following analyses.

934

### 935 *Firing irregularity*

936 For each cell, we quantified the irregularity of its CaT onsets (i.e. firing times) using CV2, as a  
937 local and relatively rate-independent measure of spike time irregularity (Holt et al., 1996;

938 Ponce-Alvarez et al., 2010):  $CV2 = \frac{1}{K-1} \sum_{k=1}^{K-1} \frac{2|ICI_{k+1} - ICI_k|}{ICI_{k+1} + ICI_k}$ , where  $ICI_k$  and  $ICI_{k+1}$  are the  $k$ th

939 and  $(k+1)$ th inter-CaT intervals of the cell, and  $K$  is the total number of its  $ICI$ s. To achieve  
940 more robust results cells with less than ten  $ICI$ s were excluded from this analysis.

941

### 942 *Network bursts*

943 Network bursts (NBs) were defined as a significant co-activation of cells as follows: (1) To  
944 account for some temporal jitter in the detection of CaT onsets, we calculated the moving  
945 maximum of the binary activity vectors of all cells in a given FOV over a sliding window of  
946 three frames. We then computed the mean across the resulting activity vectors of all  
947 individual cells to obtain the empirical fraction of active cells per frame  $\Phi(t)$ . (2) We randomly

948 shuffled CaT onsets of all cells (uniform distribution; 1,000 times), computed the surrogate  
949  $\Phi(t)$  (as above) and defined the 99.99th percentile of all surrogate  $\Phi(t)$  as the threshold for  
950 NB detection. The NB threshold was determined separately for each FOV, so as to account  
951 for different mean CaT frequencies. (3) Any frame with an empirical  $\Phi(t)$  exceeding the  
952 threshold was considered as belonging to an NB. In the resulting binary NB vectors, 0-1  
953 transitions were defined as NB onsets and 1-0 transitions as NB offsets. Using the binary NB  
954 vectors, we extracted (i) the relative time the network spent in NBs and (ii) the average NB  
955 duration. NB size was defined as the fraction of cells which were active in at least one frame  
956 of a given NB, corrected for the chance level of co-activation by subtracting the NB threshold.

957

#### 958 *Power analysis*

959 To account for missing values representing the residual drift periods (see above), spectral  
960 power of the fraction of active cells  $\Phi(t)$  was estimated by computing the Lomb-Scargle  
961 periodogram (Matlab, MathWorks).

962

#### 963 *Pairwise correlations*

964 Spike-time tiling coefficients (STTCs) were computed for all possible cell pairs with a  
965 synchronicity window of three frames (~258 ms) using custom written code (Matlab,  
966 MathWorks) (Cutts et al., 2014). STTCs derived from measured data were compared to those  
967 from surrogate data obtained by randomly shuffling (uniform distribution; 1,000 times) CaT  
968 onsets of all cells, separately. This randomization kept the mean CaT frequency of each cell  
969 unchanged.

970

#### 971 *Population coupling*

972 To quantify the degree of coupling of each cell to the overall population firing activity we  
973 computed its population coupling, PopC (Okun et al., 2015; Sweeney et al., 2020). To this  
974 end, for each cell, we first smoothed its binary vector (see above) and the summed vector of  
975 the rest of population, followed by computing PopC as the Pearson correlation coefficient  
976 between these two vectors. For smoothing, we used a Gaussian kernel with  $SD = 3$  frames.  
977 To assess the significance of the PopCs (i.e. being beyond chance) we generated surrogate  
978 data by binning the raster matrix along time-axis; non-overlapping bins with a size of 10  
979 frames (ca.  $\sqrt{12} SD$ , according to (Kruskal et al., 2007)). We randomly exchanged CaT onsets  
980 across active cells within each bin (500 times), thereby effectively preserving the CaT  
981 frequency of each cell as well as the local summed activity of the population. For each cell,  
982 using its surrogates, we determined the significance of its empirical PopC (95<sup>th</sup> percentile).  
983 Moreover, when reporting the PopC of each cell, we subtracted the mean of its surrogate  
984 PopCs, in order to account for the potential differences in population activity levels of different  
985 FOVs (for a similar approach see (Okun et al., 2015; Sweeney et al., 2020)). Cells with less  
986 than five CaTs were excluded from this analysis, to increase robustness of our results.

987

### 988 *Motifs of population activity*

989 To identify the specific cellular activation patterns recurring over time (i.e. motifs of population  
990 activity) we used an eigendecomposition-based clustering method (Li et al., 2010; Patel et al.,  
991 2015). To this end, we first divided the recording time into non-overlapping windows with a  
992 size of 10 frames, and assigned 1 and 0 to cells which were active or silent during each bin.  
993 This converts the raster matrix to a sequence of binary vectors (i.e. spatial patterns), where  
994 each pattern has a size of  $N \times 1$  ( $N$  is the number of analyzed cells in the FOV). We then  
995 computed the degree of similarity between all possible pairs of these patterns using matching

996 index (Romano et al., 2015):  $MI_{ij} = 2 \frac{|Pat_i \cap Pat_j|}{|Pat_i| + |Pat_j|}$ , where  $Pat_i$  and  $Pat_j$  are the  $i$ th and  $j$ th  
997 binary cellular activation patterns (vectors), and the norms are equal to the number of ones  
998 (i.e. active cells) in each vector. MI ranges from 0 (no similarity) to 1 (perfect similarity), and in  
999 particular approximates the number of common neuronal activations (i.e. common ones)  
1000 between pattern pairs; for more details see (Romano et al., 2015; Sporns et al., 2007).  
1001 Accordingly, for each FOV, we obtained a similarity matrix of size  $P \times P$ , where  $P$  indicates  
1002 the number of patterns. The rows and columns relating to the silent-pattern pairs were  
1003 excluded, as they were giving rise to an undefined value (i.e. 0 divided by 0). We used the MI  
1004 matrix as the input to the eigendecomposition clustering method. Briefly, this method  
1005 decomposes a given similarity matrix (here, MI matrix) into a set of eigenvalues and  
1006 eigenvectors: The number of significantly large eigenvalues determines the number of motifs,  
1007 and their corresponding eigenvectors contain the information about motif structure (i.e. the set  
1008 of patterns belonging to each motif). The largest eigenvalue is proportional to the global  
1009 similarity among all patterns. As the surrogate data for testing the statistical significance of the  
1010 eigenvalues and also computing a normalized unbiased value of global similarity index, we  
1011 used the randomly shuffled CaT onsets (see above), based on which we repeated the binning  
1012 and computation of MI matrices (500 times). This procedure enabled us to identify the motifs  
1013 of cellular activation patterns, which occurred beyond chance level. For more details about  
1014 the clustering method and its mathematical description see (Li et al., 2010).

1015

### 1016 ***Computational modeling of a developing neural network with inhibitory GABA***

1017 *Overview.* To gain insights into the mechanisms and functional role of the observed network  
1018 burstiness during the emergence of synaptic inhibition in CA1, we used computational

1019 modeling and stability analysis. For this purpose, we employed a recently established model  
 1020 of a recurrent neural network (RNN) for first postnatal month development (Rahmati et al.,  
 1021 2017). It is an extended Wilson-Cowan-type model (Tsodyks et al., 1998), and benefits from  
 1022 being biophysically interpretable and mathematically accessible. Recently, this model was  
 1023 also adapted successfully to explain key dynamics and mechanisms of GDPs in neonatal  
 1024 CA1 with excitatory GABA signaling during the first postnatal week (Flossmann et al., 2019).  
 1025 However, in accordance with previous reports and our present experimental data for the  
 1026 second postnatal week, we here use the model with mainly two specific cellular properties: I)  
 1027 GABAergic synapses are considered inhibitory (Kirmse et al., 2015; Valeeva et al., 2016;  
 1028 Murata et al., 2020), and II) the mean spontaneous firing activity of PCs is effectively non-zero  
 1029 (Fig. 2C). In the following, after providing the mathematical description of the model, we  
 1030 describe the mathematical components used for its stability analysis. For more details about  
 1031 the model and the approach see (Rahmati et al., 2017).

1032 *Model description.* The model is a mean-field network model of mean firing activity rates of  
 1033 two spatially localized, homogeneous glutamatergic and GABAergic cells (here, pyramidal  
 1034 (PC) and interneuron (IN) populations) that are recurrently connected (Fig. 6A). The model  
 1035 incorporates two short-term synaptic plasticity (STP) mechanisms, namely short-term  
 1036 synaptic depression (STD) and facilitation (STF), which render the synaptic efficacies  
 1037 dynamic over time. Hence, we call the network hereafter STP-RNN. The equations governing  
 1038 the mean-field dynamics of the STP-RNN (10D) are (dots denote the time derivatives and,  
 1039 hereafter, PC and IN are abbreviated as P and I for readability) (Rahmati et al., 2017):

$$\begin{aligned}
 \tau_P \dot{A}_P(t) &= -A_P(t) + f_P(J_{PP} u_{PP}(t) x_{PP}(t) A_P(t) - J_{PI} u_{PI}(t) x_{PI}(t) A_I(t) + e_P(t)) = -A_P(t) + f_P(h_P) \\
 \tau_I \dot{A}_I(t) &= -A_I(t) + f_I(J_{IP} u_{IP}(t) x_{IP}(t) A_P(t) - J_{II} u_{II}(t) x_{II}(t) A_I(t) + e_I(t)) = -A_I(t) + f_I(h_I) \\
 \dot{x}_{ij} &= \tau_{ij}^{-1} (1 - x_{ij}(t)) - u_{ij}(t) x_{ij}(t) A_j(t) \\
 \dot{u}_{ij} &= \tau_{ij}^{-1} (U_{ij} - u_{ij}(t)) + U_{ij} (1 - u_{ij}(t)) A_j(t)
 \end{aligned} \tag{1}$$

1041 where  $i$  and  $j \in \{P, I\}$ , and  $j$  is the index of the presynaptic population,  $A_p$  and  $A_I$  are the  
 1042 average activity rates (in Hz) of PC and IN populations which can be properly scaled to  
 1043 represent locally the average recorded activities in these populations,  $x_{ij}$  and  $u_{ij}$  are the  
 1044 average dynamic variables of STD and STF mechanisms,  $\tau_p$  and  $\tau_I$  are approximations to  
 1045 the decay time constants of the glutamatergic and GABAergic postsynaptic potentials,  $\tau_{f_{ij}}$  is  
 1046 the synaptic recovery time constant of depression,  $\tau_{f_{ij}}$  is the synaptic facilitation time  
 1047 constant,  $U_{ij}$  is analogous to the synaptic release probability,  $J_{ij}$  is the average maximum  
 1048 absolute synaptic efficacy of recurrent ( $i=j$ ) or feedback ( $i \neq j$ ) connections, and  $e_p$  and  $e_I$  are  
 1049 the external inputs received by the PC and IN populations from other brain regions or  
 1050 stimulation. In this work, we set the inputs to zero (for spontaneous baseline activity), or  
 1051 model them as excitatory pulse (with variable positive amplitude) with a duration of 20 ms  
 1052 thereby emulating e.g. the SPW-driven inputs to the PC and IN populations (Karlsson et al.,  
 1053 2006). The transformation from the summed input to each population,  $h_i$ , to an activity output  
 1054 (in Hz) is governed by the response function,  $f_i$ , defined as:

$$1055 \quad f_i(h_i) = \begin{cases} 0 & \text{for } h_i \leq \theta_i \\ G_i(h_i - \theta_i) & \text{for } \theta_i < h_i \end{cases} \quad (2)$$

1056 where  $\theta_i$  is the population activity threshold, and  $G_i$  is the linear input-output gain above  $\theta_i$ . In  
 1057 this work, we parameterize the STP-RNN as a network model representing mainly a stage  
 1058 during the second postnatal week. To do this, we mainly followed (Rahmati et al., 2017) by  
 1059 setting  $\tau_p = 0.015 \text{ s}$ ,  $\tau_I = 0.0075 \text{ s}$ ,  $J_{PP} = J_{IP} = J_P = 6.5$ ,  $J_{II} = J_{PI} = J_I = 3$ ,  $\tau_{f_{PP}} = \tau_{f_{IP}} = \tau_{f_P} = 3 \text{ s}$ ,  
 1060  $\tau_{f_{II}} = \tau_{f_{PI}} = \tau_{f_I} = 2.5 \text{ s}$ ,  $\tau_{f_{PP}} = \tau_{f_{IP}} = \tau_{f_P} = 0.4 \text{ s}$ ,  $\tau_{f_{II}} = \tau_{f_{PI}} = \tau_{f_I} = 0.4 \text{ s}$ ,  $U_{PP} = U_{IP} = U_P = 0.8$ ,  
 1061  $U_{II} = U_{PI} = U_I = 0.8$ ,  $\theta_P = 0.22$ ,  $\theta_I = 0.53$ ,  $G_P = G_I = 1$ , and  $e_p = e_I = 0 \text{ Hz}$  (for spontaneous

1062 baseline activity). According to these parameter values: I) both glutamatergic and GABAergic  
 1063 connections will act depressing, and II) the network will spontaneously have, in addition to a  
 1064 silent state, an active state where both  $A_I$  and, in particular,  $A_p$  are effectively non-zero, and  
 1065 III) GABAergic transmission will be inhibitory (note the positive value of  $J_I$ ). Note that points  
 1066 II) and III) render the model inherently different from the neonatal STP-RNN used by  
 1067 (Flossmann et al., 2019).

1068 *Frozen STP-RNN.* A Frozen STP-RNN is obtained by freezing the synaptic efficacies of a  
 1069 STP-RNN; i.e. by fixing the STP variables  $x_{ij}$  and  $u_{ij}$  at the values of interest. This will convert  
 1070 the STP-RNN (10D; see Eq. 1) effectively to a 2D network with constant synaptic weights. As  
 1071 shown in (Rahmati et al., 2017) and (Flossmann et al., 2019), the Frozen STP-RNN can  
 1072 provide a reliable approximation to the stability behavior of a STP-RNN at the state chosen for  
 1073 freezing (see below). The equations governing the dynamics of a Frozen STP-RNN are:

$$1074 \begin{aligned} \tau_p \dot{A}_p(t) &= -A_p(t) + f_p \left( J_{pp}^{\text{frz}} A_p(t) - J_{pI}^{\text{FP}} A_I(t) + e_p(t) \right) \\ \tau_I \dot{A}_I(t) &= -A_I(t) + f_I \left( J_{IP}^{\text{frz}} A_p(t) - J_{II}^{\text{frz}} A_I(t) + e_I(t) \right) \end{aligned} \quad (3)$$

1075 where  $J_{ij}^{\text{frz}} = J_{ij} u_{ij}^{\text{frz}} x_{ij}^{\text{frz}}$ , and  $u_{ij}^{\text{frz}}$  and  $x_{ij}^{\text{frz}}$  are the values of  $u_{ij}$  and  $x_{ij}$  (see Eq. 1) at the state of  
 1076 interest; here, at a silent state, active state, or the time of network burst's peak (see Results).

1077 *Phase plane.* To visualize the stability behavior of our network model, we used the phase  
 1078 plane analysis based on the activity rates:  $A_I$ - $A_p$ -plane (2D). The  $A_I$ - $A_p$ -plane sketch includes  
 1079 the curves of the  $A_p$ -nullcline and  $A_I$ -nullcline representing sets of points for which  $\dot{A}_p(t) = 0$   
 1080 and  $\dot{A}_I(t) = 0$ . Any intersection of these nullclines is called a fixed point (FP), with the stability  
 1081 needed to be determined (see below). For the STP-RNN, these FPs represent the steady  
 1082 states of the full network, i.e. the 10D STP-RNN in Eq. 1 (see also Fig. 6B). For the Frozen  
 1083 STP-RNN (thus, 2D; see Eq. 3) with synaptic efficacies frozen at the state of interest (e.g.

1084 silent state), these FPs may include that state, and possibly some other FPs which may not  
1085 exist in the STP-RNN itself (e.g. see Figs. 6D and 7C). In addition to the visualization of the  
1086 FPs in the  $A_1$ - $A_p$ -plane, we also computed the FPs by numerically solving Eq. 1 and Eq. 3  
1087 (separately) after setting the right hand side of the equations to zero. For more details see  
1088 (Rahmati et al., 2017).

1089 *Stability of FPs.* To determine the stability of any FP in the STP-RNN (resp. in the Frozen  
1090 STP-RNN) we applied the linear stability analysis to its 10D (resp. 2D) system of equations in  
1091 Eq. 1 (resp. Eq. 3): We investigated whether all eigenvalues of the corresponding Jacobian  
1092 matrix have strictly negative real parts (if so, the FP is stable), or whether at least one  
1093 eigenvalue with a positive real part exists (if so, the FP is unstable).

1094 *Simulations.* All simulation results in this paper have been implemented as Mathematica and  
1095 Matlab (MathWorks) code. For network simulations, we set the integration time-step size to  
1096 0.0002 s. In Fig. 6C, the initial conditions of the STP-RNN variables were set to those values  
1097 of the spontaneous stable FP of the network at the active state.

1098

### 1099 ***Statistical analysis***

1100 Statistical analyses were performed using OriginPro 2018 and Microsoft Excel 2010 using the  
1101 Real Statistics Resource Pack software (Release 7.2, Charles Zaiontz). Unless otherwise  
1102 stated, the statistical parameter  $n$  refers to the number of FOVs (P4: 19 FOVs from six  
1103 animals, P11: 11 FOVs from six animals, P18: 12 FOVs from six animals). All data are  
1104 reported as mean  $\pm$  standard error of the mean (SEM), if not stated otherwise. The Shapiro–  
1105 Wilk test was used to test for normality. Homogeneity of variances was tested with the  
1106 Levene's test using the median. For multi-group comparisons, analysis of variance (ANOVA)  
1107 was applied for normally distributed data or the Kruskal-Wallis test for non-normally



1108 distributed data. In the case of unequal group variances, Welch's correction was applied for  
1109 the ANOVA. Following a significant result in the ANOVA, *post-hoc* pairwise comparisons were  
1110 performed using the Tukey-Kramer (equal variances) or the Games-Howell (unequal  
1111 variances) test. Following a significant result in the Kruskal-Wallis test, *post-hoc* pairwise  
1112 Mann-Whitney U-tests following Holm's approach were performed. P values (two-tailed tests)  
1113 < 0.05 were considered statistically significant, except for the Shapiro-Wilk test ( $P < 0.01$ ).  
1114 Details of the statistical tests applied are provided in Tables S1–S5.

1115

#### 1116 ***Data and code availability***

1117 All datasets and codes generated during this study are available from the corresponding  
1118 author upon request.
